## Lab Resource: Multiple Stem Cell Lines

**Title:** Generation of twenty four induced pluripotent stem cell lines from twenty four members of the Lothian Birth Cohort 1936

**Authors:** Jamie Toombs<sup>a</sup>, Lindsay Panther<sup>b,c</sup>, Loren Ornelas<sup>b,c</sup>, Chunyan Liu<sup>b,c</sup>, Emilda Gomez<sup>b,c</sup>, Raquel Martín-Ibáñez<sup>c</sup>, Simon R. Cox<sup>d</sup>, Stuart J. Ritchie<sup>d</sup>, Sarah E. Harris<sup>d</sup>, Adele Taylor<sup>d</sup>, Paul Redmond<sup>d</sup>, Tom C. Russ<sup>d</sup>, Lee Murphy<sup>e</sup>, James D. Cooper<sup>f,k</sup>, Karen Burr<sup>f,k</sup>, Bhuvaneish T. Selvaraj<sup>f,k</sup>, Cathy Browne<sup>i</sup>, Clive N. Svendsen<sup>g,h</sup>, Sally A. Cowley<sup>i,j</sup>, Ian J. Deary<sup>d</sup>, Siddharthan Chandran<sup>f,k</sup>, Tara Spires-Jones<sup>a,‡</sup>, Dhruv Sareen<sup>b,c,g,h,‡</sup>

### Affiliations:

- a) Centre for Discovery Brain Sciences, UK Dementia Research Institute, The University of Edinburgh, UK.
  - b) iPSC Core, The David Janet Polak Foundation Stem Cell Core Laboratory, Cedars-Sinai Medical Center, Los Angeles, CA, 90048, USA.
  - c) Cedars-Sinai Biomanufacturing Center, West Hollywood, CA, 90069, USA.
  - d) Lothian Birth Cohorts, Department of Psychology, University of Edinburgh, Edinburgh, UK.
  - e) Edinburgh Clinical Research Facility, University of Edinburgh, Edinburgh, UK.
  - f) Dementia Research Institute at the University of Edinburgh, UK
  - g) Board of Governors-Regenerative Medicine Institute, Cedars-Sinai Medical Center, Los Angeles, CA, 90048, USA.
  - h) Department of Biomedical Sciences, Cedars-Sinai Medical Center, Los Angeles, CA, 90048, USA.
  - i) James Martin Stem Cell Facility, Sir William Dunn School of Pathology, University of Oxford, Oxford, UK.
  - j) Oxford Parkinson's Disease Centre, Oxford, UK.
  - k) Centre for Clinical Brain Sciences, University of Edinburgh, Edinburgh, Scotland, UK.
- ‡ Corresponding authors.

### Abstract:

Cognitive decline is among the most feared aspects of ageing. We have generated induced pluripotent stem cells (iPSCs) from 24 people from the Lothian Birth Cohort 1936, whose cognitive ability was tested in childhood and in older age. Peripheral blood mononuclear cells (PBMCs) were reprogrammed using non-integrating oriP/EBNA1 backbone plasmids expressing six iPSC reprogramming factors (OCT3/4 (POU5F1), SOX2, KLF4, L-Myc, shp53, Lin28, SV40LT). All lines demonstrated STR matched karyotype and pluripotency was validated by multiple methods. These iPSC lines are a valuable resource to study molecular mechanisms underlying individual differences in cognitive ageing and resilience to age-related neurodegenerative diseases.

**Resource Table:**

|                                      |                                                                                                                                                                                                                                                                                                                     |
|--------------------------------------|---------------------------------------------------------------------------------------------------------------------------------------------------------------------------------------------------------------------------------------------------------------------------------------------------------------------|
| Unique stem cell lines identifier    | EDi021-A<br>EDi022-A<br>EDi023-A<br>EDi025-A<br>EDi026-A<br>EDi027-A<br>EDi028-A<br>EDi029-A<br>EDi030-A<br>EDi031-A<br>EDi032-A<br>EDi033-A<br>EDi034-A<br>EDi035-A<br>EDi036-A<br>EDi037-A<br>EDi038-A<br>EDi039-A<br>EDi040-A<br>EDi041-A<br>EDi042-A<br>EDi043-A<br>EDi044-A<br>EDi045-A                        |
| Alternative names of stem cell lines | N/A                                                                                                                                                                                                                                                                                                                 |
| Institution                          | Cedars-Sinai Medical Center, Los Angeles, USA                                                                                                                                                                                                                                                                       |
| Contact information of distributor   | USA distributor: Dhruv Sareen - <a href="mailto:dhruv.sareen@cshs.org">dhruv.sareen@cshs.org</a><br><br>UK distributor: Karen Burr – <a href="mailto:Karen.burr@ed.ac.uk">Karen.burr@ed.ac.uk</a><br><br>Clinical data distributor: Paul Redmond – <a href="mailto:paul.redmond@ed.ac.uk">paul.redmond@ed.ac.uk</a> |
| Type of cell lines                   | iPSC                                                                                                                                                                                                                                                                                                                |

|                                 |                                                                                                                                                                                                                                                                                                                                                                                                                                                                                                                                                                      |
|---------------------------------|----------------------------------------------------------------------------------------------------------------------------------------------------------------------------------------------------------------------------------------------------------------------------------------------------------------------------------------------------------------------------------------------------------------------------------------------------------------------------------------------------------------------------------------------------------------------|
| Origin                          | Human                                                                                                                                                                                                                                                                                                                                                                                                                                                                                                                                                                |
| Cell Source                     | Peripheral Blood Mononuclear Cell                                                                                                                                                                                                                                                                                                                                                                                                                                                                                                                                    |
| Clonality                       | Clonal                                                                                                                                                                                                                                                                                                                                                                                                                                                                                                                                                               |
| Method of reprogramming         | Non-integrating episomal plasmids                                                                                                                                                                                                                                                                                                                                                                                                                                                                                                                                    |
| Multiline rationale             | 24 cell lines from a shared birth year/region cohort                                                                                                                                                                                                                                                                                                                                                                                                                                                                                                                 |
| Gene modification               | NO                                                                                                                                                                                                                                                                                                                                                                                                                                                                                                                                                                   |
| Type of modification            | N/A                                                                                                                                                                                                                                                                                                                                                                                                                                                                                                                                                                  |
| Associated disease              | Relatively healthy volunteers                                                                                                                                                                                                                                                                                                                                                                                                                                                                                                                                        |
| Gene/locus                      | N/A                                                                                                                                                                                                                                                                                                                                                                                                                                                                                                                                                                  |
| Method of modification          | N/A                                                                                                                                                                                                                                                                                                                                                                                                                                                                                                                                                                  |
| Name of transgene or resistance | N/A                                                                                                                                                                                                                                                                                                                                                                                                                                                                                                                                                                  |
| Inducible/constitutive system   | N/A                                                                                                                                                                                                                                                                                                                                                                                                                                                                                                                                                                  |
| Date archived/stock date        | EDi021-A: 14/07/2017<br>EDi022-A: 26/04/2017<br>EDi023-A: 29/03/2017<br>EDi025-A: 23/02/2018<br>EDi026-A: 30/06/2017<br>EDi027-A: 03/05/2017<br>EDi028-A: 14/06/2017<br>EDi029-A: 28/07/2017<br>EDi030-A: 19/05/2017<br>EDi031-A: 21/03/2018<br>EDi032-A: 18/01/2017<br>EDi033-A: 31/08/2016<br>EDi034-A: 16/12/2016<br>EDi035-A: 22/03/2017<br>EDi036-A: 13/01/2017<br>EDi037-A: 24/02/2017<br>EDi038-A: 23/06/2017<br>EDi039-A: 06/06/2018<br>EDi040-A: 21/06/2017<br>EDi041-A: 18/08/2017<br>EDi042-A: 14/06/2017<br>EDi043-A: 03/02/2017<br>EDi044-A: 03/05/2017 |

|                           |                                                                                                                                                                                                                                                                                                                                                                                                                                                                                                                                                                                                                                                                                                                                                                                                                                                                                                                                                                                                                                                                                                                                                                                                                              |
|---------------------------|------------------------------------------------------------------------------------------------------------------------------------------------------------------------------------------------------------------------------------------------------------------------------------------------------------------------------------------------------------------------------------------------------------------------------------------------------------------------------------------------------------------------------------------------------------------------------------------------------------------------------------------------------------------------------------------------------------------------------------------------------------------------------------------------------------------------------------------------------------------------------------------------------------------------------------------------------------------------------------------------------------------------------------------------------------------------------------------------------------------------------------------------------------------------------------------------------------------------------|
|                           | EDi045-A: 21/02/2018                                                                                                                                                                                                                                                                                                                                                                                                                                                                                                                                                                                                                                                                                                                                                                                                                                                                                                                                                                                                                                                                                                                                                                                                         |
| Cell line repository/bank | <p>The following lines have been added to the Cedars-Sinai iPSC Core Repository which can be viewed by the public online at <a href="https://biomanufacturing.cedars-sinai.org">https://biomanufacturing.cedars-sinai.org</a>. Direct links to each database record are included below.</p> <p>Edi021-A (<a href="#">Link</a>)</p> <p>Edi022-A (<a href="#">Link</a>)</p> <p>Edi023-A (<a href="#">Link</a>)</p> <p>Edi025-A (<a href="#">Link</a>)</p> <p>Edi026-A (<a href="#">Link</a>)</p> <p>Edi027-A (<a href="#">Link</a>)</p> <p>Edi028-A (<a href="#">Link</a>)</p> <p>Edi029-A (<a href="#">Link</a>)</p> <p>Edi030-A (<a href="#">Link</a>)</p> <p>Edi031-A (<a href="#">Link</a>)</p> <p>Edi032-A (<a href="#">Link</a>)</p> <p>Edi033-A (<a href="#">Link</a>)</p> <p>Edi034-A (<a href="#">Link</a>)</p> <p>Edi035-A (<a href="#">Link</a>)</p> <p>Edi036-A (<a href="#">Link</a>)</p> <p>Edi037-A (<a href="#">Link</a>)</p> <p>Edi038-A (<a href="#">Link</a>)</p> <p>Edi040-A (<a href="#">Link</a>)</p> <p>Edi041-A (<a href="#">Link</a>)</p> <p>Edi042-A (<a href="#">Link</a>)</p> <p>Edi043-A (<a href="#">Link</a>)</p> <p>Edi044-A (<a href="#">Link</a>)</p> <p>Edi045-A (<a href="#">Link</a>)</p> |
| Ethical approval          | <p>NHS Lothian Research Ethics Committee: 10/S1103/10.</p> <p>CSMC Induced Pluripotent Stem Cell (iPSC) Core Facility</p> <p>Repository and Stem Cell program IRB Protocol: Pro00032834</p>                                                                                                                                                                                                                                                                                                                                                                                                                                                                                                                                                                                                                                                                                                                                                                                                                                                                                                                                                                                                                                  |

### Resource utility

The neurobiology of cognitive ability and its decline during ageing are poorly understood. Human iPSC lines from the Lothian Birth Cohort 1936 comprise individuals with rich life-course cognitive performance data

(Taylor et al., 2018; Wardlaw et al., 2011), affording a rare model to investigate molecular mechanisms relevant to differences in brain development, cellular resilience, and vulnerability to pathology.

## Resource Details

Human peripheral blood mononuclear cells (PBMCs) were obtained from 24 unrelated members of the Lothian Birth Cohort 1936. Demographic parameters are 50% female (n = 12), 100% white Scottish (Table 1). Line donors can be grouped into ‘successful’, ‘typical’, and ‘poor’ cognitive ageing categories (sFig.1). Exclusion criteria were: self-reported dementia, Parkinson’s disease or stroke, Mini Mental State Examination (MMSE) score <24, as well as standardised childhood IQ scores (<65, Moray House Test No. 12 at age 11), and standardised adult IQ scores (<85, average of Moray House Test No. 12 at age 70 and 76).

PBMCs were reprogrammed to generate induced pluripotent stem cells (iPSCs) using episomal plasmids encoding human OCT3/4 (POU5F1), SOX2, KLF4, L-Myc, shp53, Lin28, SV40LT. All lines were reprogrammed and stored within 22 months of each other. EBNA-related gene analysis demonstrated that iPSCs were EBNA transgene-free (and therefore exogenous reprogramming factors were no longer present) by passage 17-21 (depending on line). Qualitative tests for parental cell type by TCR- $\alpha\beta$  and TCR- $\gamma\delta$  T-cell clonality assay revealed that 83% (n = 20) of lines were non-T cell-derived, 17% (n = 4) were T-cell derived. T-cell derived lines are: EDi021-A, EDi025-A, EDi026-A, and EDi035-A.

Pluripotency was confirmed by the expression of six pluripotency markers (OCT3/4, NANOG, SOX2, TRA-1-60, TRA-1-81, SSEA4) evaluated by immunocytochemistry (Fig.1B, sFig.2-24B). Additionally, all lines demonstrated positive alkaline phosphatase AP staining (Fig.1A, sFig.2-24A) and self-renewal in undifferentiated iPSCs as assessed by PluriTest (Fig.1C, sFig.2-24C) and TaqMan<sup>®</sup>hPSC Scorecard<sup>™</sup> Panel (Fig.1D, sFig.2-24E). However, whilst EDi035-A had a positive PluriTest and Scorecard<sup>™</sup> pluripotency result, the PluriTest novelty score was borderline (1.688) (sFig.14C,E). Furthermore, EDi027-A also had a borderline positive ectoderm score as assessed by Scorecard<sup>™</sup> (sFig.6E). At 14 days of embryoid body differentiation, all lines demonstrated tri-lineage potential except EDi022-A (negative endoderm, borderline mesoderm score, sFig.2E), EDi035-A (negative mesoderm, borderline endoderm score, sFig.14E), and EDi042-A (negative endoderm score, sFig.21E), as assessed by Scorecard<sup>™</sup>.

All lines showed a normal karyotype (Fig.1D, sFig. 2-24D) between passages 6-22, with one exception. All five clones of EDi-038-A (a male) karyotyped as monosomy (45,X) (sFig.18D), and thus very likely stems from the source PBMCs. Mosaicism is a relatively common and probably harmless finding in blood cultures from normal females and, though rarer, also in males (Bukvic et al., 2001). No differences were detected between the original PBMC samples and the corresponding iPSC lines.

All lines were confirmed to be of human origin and iPSCs matched the profile of parent PBMCs by Short Tandem Repeat (STR) analysis. Parent line data was not available for EDi026-A and EDi028-A. Genetic profiles for these lines were compared to the cell line genetic profiles available in the DSMZ STR database and did not match any other reported profiles in the DSMZ database. These profiles were found to be unique and did not match to any previously submitted profiles from the iPSC Core. The genetic profiles established here can be used for future comparisons for these cell lines. Whole genome sequence data for all 24 lines has been deposited at the European Genome-phenome Archive (EGA), which is hosted by the EBI and the CRG, under accession number EGAS00001003819.

An overview of iPSC line characterisation can be found in Table 2. Figure 1 presents example characterisation data from EDi021-A. Data for all other lines can be found in Supplementary Figures 2-24.

## **Materials and Methods**

### ***PBMC isolation***

Blood samples were collected with NHS Lothian Research Ethics Committee Approval (10/S1103/10). Blood samples were collected in Sodium Citrate BD Vacutainer CPT tubes (BD, Cat. 362761) (three tubes per participant). For samples EDi021-A, EDi025-A, EDi028-A, EDi030-A, EDi031-A, EDi032-A, EDi033-A, EDi034-A, and EDi035-A PBMC isolation was performed by Roslin Cells. For all other lines, PBMC isolation was performed by the Edinburgh Clinical Research Facility (ECRF).

### ***Generation of human iPSCs***

Generation of human iPSCs lines from PBMCs was performed using nucleofection of episomal plasmids containing POU5F1, SOX2, KLF4, LIN28, L-MYC, TP53shRNA, and SV40LT.

Briefly,  $\sim 5 \times 10^6$  cells per nucleofection of PBMCs were nucleofected with plasmid mixture 5p on the Amaxa Nucleofector 2D Device with the Amaxa Human T-cell Nucleofector<sup>®</sup> Kit. Each transfection contained the following seven factors: OCT4, SOX2, KLF4, LMYC, LIN28, SV40LT and p53 shRNA. These were delivered on the following plasmids, together with an EBNA1 plasmid for episomal plasmid maintenance: pEP4 E02S ET2K, pCXLE-hOCT3/4-shp53-F, pCXLEhUL, pCXLE-hSK, and pCXWB-EBNA1. Nucleofected cells were immediately seeded into three wells of a 6-well plate covered with mitomycin treated mouse embryonic feeder (MEF) layer, and fed with 2mL of either  $\alpha\beta$  T-cell medium (X-vivo10 supplemented with 30U/ml IL-2 and 5ul/well Dynabeads Human T-activator CD3/CD28) or non T-cell medium ( $\alpha$ MEM supplemented with 10% FBS, 10ng/ml IL-3, 10ng/ml IL-6, 10ng/ml G-CSF and 10ng/ml GM-CSF).

Two days after nucleofection, an equal amount of Primate ESC medium (ReproCell) containing 5ng/ml bFGF (for MEF condition) was added to the wells without aspirating the previous medium. Beginning on day four, the medium was gently aspirated from each well and 2mL of the appropriate fresh reprogramming media was added to each well. Medium was replaced every other day. At approximately day 18 post nucleofection, individual colonies were observed in all wells of each condition. Individual PBMC-iPSC colonies with ES/iPSC-like morphology appeared between day 25-32 and those with best morphology were mechanically isolated, transferred onto 12-well plates with fresh Matrigel™ Matrix (Corning/BD Biosciences, Cat. 354230), and maintained in mTeSR®1 medium (STEMCELL). The iPSC clones were further expanded and scaled up for further analysis. All cultures were maintained at 20% O<sub>2</sub>, 5% CO<sub>2</sub> during the reprogramming process.

### ***iPSC maintenance and storage***

Human iPSCs were cultured in mTeSR®1 medium (STEMCELL) on growth factor-reduced Matrigel™ Matrix (BD Biosciences)-coated plates at 37°C in a 5% CO<sub>2</sub> incubator. Briefly, 70–90% confluent human iPSC colonies were passaged chemically (Versene, Life Technologies, Cat. 15040-066 or ReLeSR, StemCell Technologies, Cat. 05872) or mechanically by StemPro® EZPassage™ Disposable Stem Cell Passaging Tool (Life Technologies, Cat. 23181-010) and re-plated at a 1:6 or 1:9 ratio depending on the cell line. The iPSCs were expanded for 6-22 passages during which period various characterization assays were performed. The iPSCs were cryopreserved using CryoStor CS10 (StemCell Technologies) and an isopropanol freezing vessel at -80°C overnight. The cryopreserved vials were subsequently stored in liquid nitrogen tanks for long-term storage. Working Cell Banks (WCB) of iPSCs were cryopreserved at passage 9-14 and then Distribution Cells Banks (DCB) were created between passages 18-22.

### ***Mycoplasma testing***

The absence of mycoplasma contamination in the iPSC lines were confirmed monthly using the MycoAlert Detection Kit, a selective biochemical test (LONZA, Cat. LT07-1188).

### ***EBNA-related gene analysis***

Genomic DNA (250ng) was harvested from all cell lines and an embryonic stem cell line (H9) was used as a negative control. Primers that recognize EBNA1 along with housekeeping gene Glyceraldehyde 3-phosphate dehydrogenase (GAPDH), which was used as a housekeeping gene, were included in this study (Table 2). PCR was run for 35 cycles at 95°C for 30 seconds, 60°C for 30 seconds, and 72°C for 30 seconds.

### ***TCRB and TCRG T-Cell Clonality Assay***

TCRB and TCRG T-Cell Clonality testing was conducted using Gene Rearrangement and Translocation assays from Invivoscribe Technologies, Inc. Genomic DNA was harvested from all iPSC lines using the MagMAX™ DNA Multi-Sample Ultra 2.0 Kit (Cat. A36570) from Applied Biosystems and it was re-suspended to a final

concentration of 100-400µg per ml in dilution buffer. Three Clonal Control DNA and one Polyclonal Control DNA provided with the kit were used. PCR was carried out as per the manufacturer's protocol. PCR products were analysed using 6% TBE gel electrophoresis with gel red staining.

### ***Karyotyping***

Human PBMC-iPSCs were incubated in Colcemid (100ng/mL; Life Technologies) for 30 minutes at 37°C and then dissociated using TrypLE for 5 minutes. They were then washed in phosphate buffered saline (PBS) and incubated at 37°C in 5mL hypotonic solution (1g KCl, 1g Na Citrate in 400mL water) for 30 minutes. The cells were centrifuged for 2.5 minutes at 1500RPM and re-suspended in fixative (methanol: acetic acid, 3:1) at room temperature for 5 minutes. This was repeated twice, and finally cells were re-suspended in 500µl of fixative solution and submitted to the Cedars-Sinai Clinical Cytogenetics Core for G-band karyotyping. Karyotyping of each iPSC line was conducted at early and late passage, between passages 6-22.

### ***Immunocytochemistry***

iPSCs were plated on Matrigel™ Matrix (BD Biosciences)-coated glass coverslips or optical-bottom 96-well plates (Thermo, Cat. 165305) and subsequently fixed in 4% paraformaldehyde (ten minutes, room temperature (RT)). All cells were blocked in 4-5% goat or donkey serum with 0.1% Triton X-100 (one hour, RT) and incubated with primary antibodies (Table 3) for either 3 hours at RT or overnight at 4°C. Cells were then rinsed and incubated in species-specific AF488 or AF594-conjugated secondary antibodies (1:500) (one hour, RT), followed by DAPI (0.5-1µg/ml; Sigma) to counterstain nuclei (10 minutes, RT). Cells were imaged using Nikon/Leica microscopes or Image Express. The iPSCs exhibited an embryonic stem cell like morphology, and expressed a range of pluripotency markers (OCT3/4, NANOG, SOX2, TRA-1-60, TRA-1-81, SSEA4) (Figure 1B, Supplementary Figures 2-24B).

### ***Alkaline phosphatase staining***

Alkaline phosphatase staining was performed using the Alkaline Phosphatase Staining Kit II (Stemgent, Cat. 00-0055) according to the manufacturer's instructions.

### ***PluriTest***

PluriTest was used to assess the pluripotency of undifferentiated iPSCs (Figure 1C, Supplementary Figures 2-24C). Cell pellets were sent to Life Technologies Corporation for the PluriTest Service. Total RNA was isolated using the PureLink™ RNA Mini Kit (Thermo Fisher Scientific) and quantified using NanoDrop™. 100ng total RNA was used to prepare the GeneChip® for the PluriTest™. In this assay, 36,000 transcripts and variants against a >450 sample reference set are assessed for gene expression analysis. A non-iPSC sample was used in this experiment to serve as a control for non-pluripotency. The transcriptome of all samples were analysed and processed in the PluriTest™ algorithm to generate a pluripotency and novelty score. These two scores



determine the pluripotency signature of the cell line which is represented in the pluripotency plot. The threshold for pluripotency was  $>20$ , and the threshold for novelty was  $<1.6$ .

### ***hPSC Scorecard Data Analysis***

Applied Biosystems TaqMan<sup>®</sup>hPSC Scorecard<sup>™</sup> Panel (Thermo Fisher Scientific) was used as an additional technique to assess pluripotency and tri-lineage differentiation potential of iPSC lines using real-time qPCR assays (Figure 1E, Supplementary Figures 2-24E). Total RNA from undifferentiated and EB differentiated iPSC lines was isolated using MagMAX<sup>™</sup> mirVana<sup>™</sup> Total RNA Isolation Kit (A27828), and 1 $\mu$ g of RNA was used to make cDNA using the High Capacity cDNA Reverse Transcription Kit (4368813), both from Applied Biosystems. TaqMan qRT-PCR was carried out using the hPSC Scorecard 384w Fast plate and following manufacturer protocol. We analysed the gene expression data from the TaqMan<sup>®</sup>hPSC Scorecard<sup>™</sup> Panel using the web-based hPSC Scorecard<sup>™</sup> Analysis Software (Thermo Fisher Scientific).

### ***Embryoid Body (EB) Formation***

iPSC lines were allowed to differentiate by EB formation. Briefly, iPSCs were lifted from 3 wells of a 6 well plate using a cell scraper and seeded in a T25 flask treated with poly-HEMA to prevent cell attachment in EB media containing: IMDM basal media (Cat. 12440061), 17% KnockOut Serum Replacement (KOSR; Cat. 10828028), 1% non-essential amino acids (Cat. 11140050), 1% Antibiotic-Antimycotic (Cat. 15240062) and 110 $\mu$ M  $\beta$ -Mercaptoethanol (Cat. 21985023), all from Thermo Fisher. EBs were allowed to form by self-aggregation, grow and differentiate for 14 days in EB culture media replacing it twice a week. Differentiation to endoderm, mesoderm and ectoderm was assessed by TaqMan<sup>®</sup> hPSC Scorecard<sup>™</sup> Assay (Figure 1E, Supplementary Figures 2-24E).

### ***STR Analysis***

Short Tandem Repeat (STR) Analysis is conducted to confirm iPSC genetic identity. For that, a frozen vial of the parent PBMCs and a frozen vial of the reprogrammed iPSC line at late passage (18-21, depending on the cell line) are sent to IDEXX BioResearch. STR profile and interspecies contamination testing is analysed. iPSC line human authentication was conducted at IDEXX BioResearch by Cell Check<sup>™</sup>. Profiling included using a nine marker STR profile (AMEL, CSF1PO, D13S317, D16S539, D5S818, D7S820, TH01, TPOX and vWA) and interspecies contamination check for human, mouse, rat, African green monkey and Chinese hamster cells. Comparative analysis was conducted between parent PBMCs and reprogrammed iPSC lines.

### ***Funding***

This work was funded by MRC Dementias Platform UK Stem Cell Network Capital Equipment MC\_EX\_MR/N50192X/1 and Partnership Award MR/N013255/1, the UK Dementia Research Institute which receives its funding from DRI Ltd, funded by the UK Medical Research Council, Alzheimer's Society, and

Alzheimer's Research UK, and the European Research Council (ERC) under the European Union's Horizon 2020 research and innovation programme (Grant agreement No. 681181). Funding for the Lothian Birth Cohort 1936 (LBC1936) has been received from Research Into Ageing programme grant and the Age UK-funded Disconnected Mind project. Additional funding from the UK Medical Research Council (MRC; G0701120, G1001245, MR/M013111/1; MR/R024065/1), National Institutes of Health (R01AG054628) and the University of Edinburgh is gratefully acknowledged. This work was undertaken as part of the Cross Council and University of Edinburgh Centre for Cognitive Ageing and Cognitive Epidemiology (CCACE), funded by the Biotechnology and Biological Sciences Research Council (BBSRC) and the MRC (MR/K026992/1). A portion of the personnel support for the generation and maintenance of iPSCs was supported by Cedars-Sinai Institutional Funds. The funders had no role in study design, data collection and analysis, decision to publish, or preparation of the manuscript.

### **Acknowledgements**

We thank the LBC1936 participants who took part in this study, and gratefully acknowledge the contribution of the late Professor John M. Starr, who was the Lothian Birth Cohort 1936's research medical doctor from its beginning in 2004 until 2018. Additionally, we would like to thank the Edinburgh Clinical Research Facility nursing staff, Roslin Cells, and the LBC research team members for their contributions to sample collection, sample processing, and data processing respectively. Finally, we thank The David and Janet Polak Foundation for their support of the Cedars-Sinai iPSC Core laboratory.

### **Competing interests**

US patent US 10,221,395 B2 has been granted describing some of the methods to reprogram to iPSCs. Apart from this issued patent filing the authors have declared that no other competing financial interests exist.

### **References**

- Bukvic, N., Gentile, M., Susca, F., Fanelli, M., Serio, G., Buonadonna, L., Capurso, A., Guanti, G., 2001. Sex chromosome loss, micronuclei, sister chromatid exchange and aging: a study including 16 centenarians. *Mutat. Res. Toxicol. Environ. Mutagen.* 498, 159–167. [https://doi.org/10.1016/S1383-5718\(01\)00279-0](https://doi.org/10.1016/S1383-5718(01)00279-0)
- Taylor, A.M., Pattie, A., Deary, I.J., 2018. Cohort Profile Update: The Lothian Birth Cohorts of 1921 and 1936. *Int. J. Epidemiol.* 47, 1042-1042r. <https://doi.org/10.1093/ije/dyy022>
- Wardlaw, J.M., Bastin, M.E., Valdés Hernández, M.C., Maniega, S.M., Royle, N.A., Morris, Z., Clayden, J.D., Sandeman, E.M., Eadie, E., Murray, C., Starr, J.M., Deary, I.J., 2011. Brain Aging, Cognition in Youth and Old Age and Vascular Disease in the Lothian Birth Cohort 1936: Rationale, Design and Methodology of the Imaging Protocol. *Int. J. Stroke* 6, 547–559. <https://doi.org/10.1111/j.1747-4949.2011.00683.x>

**Table 1: Summary of lines**

| <b>iPSC line names</b> | <b>Abbreviation in figures</b> | <b>Gender</b> | <b>Age at collection</b> | <b>Ethnicity</b>  | <b>Genotype of locus</b> | <b>Disease</b> |
|------------------------|--------------------------------|---------------|--------------------------|-------------------|--------------------------|----------------|
| EDi021-A               |                                | M             | 78.8                     | White<br>Scottish | N/A                      | N/A            |
| EDi022-A               |                                | M             | 79.22                    | White<br>Scottish | N/A                      | N/A            |
| EDi023-A               |                                | F             | 79.1                     | White<br>Scottish | N/A                      | N/A            |
| EDi025-A               |                                | M             | 78                       | White<br>Scottish | N/A                      | N/A            |
| EDi026-A               |                                | M             | 79.45                    | White<br>Scottish | N/A                      | N/A            |
| EDi027-A               |                                | F             | 79.65                    | White<br>Scottish | N/A                      | N/A            |
| EDi028-A               |                                | M             | 79.1                     | White<br>Scottish | N/A                      | N/A            |
| EDi029-A               |                                | M             | 80.13                    | White<br>Scottish | N/A                      | N/A            |
| EDi030-A               |                                | F             | 78.98                    | White<br>Scottish | N/A                      | N/A            |
| EDi031-A               |                                | F             | 78                       | White<br>Scottish | N/A                      | N/A            |
| EDi032-A               |                                | F             | 79.29                    | White<br>Scottish | N/A                      | N/A            |
| EDi033-A               |                                | F             | 78.67                    | White<br>Scottish | N/A                      | N/A            |
| EDi034-A               |                                | F             | 78.68                    | White<br>Scottish | N/A                      | N/A            |
| EDi035-A               |                                | F             | 78.79                    | White<br>Scottish | N/A                      | N/A            |
| EDi036-A               |                                | F             | 79.22                    | White<br>Scottish | N/A                      | N/A            |
| EDi037-A               |                                | M             | 79.1                     | White<br>Scottish | N/A                      | N/A            |

|          |  |   |       |                   |     |     |
|----------|--|---|-------|-------------------|-----|-----|
| EDi038-A |  | M | 79.19 | White<br>Scottish | N/A | N/A |
| EDi039-A |  | M | 78    | White<br>Scottish | N/A | N/A |
| EDi040-A |  | M | 79.67 | White<br>Scottish | N/A | N/A |
| EDi041-A |  | F | 80.13 | White<br>Scottish | N/A | N/A |
| EDi042-A |  | F | 79.42 | White<br>Scottish | N/A | N/A |
| EDi043-A |  | M | 80.26 | White<br>Scottish | N/A | N/A |
| EDi044-A |  | F | 79.85 | White<br>Scottish | N/A | N/A |
| EDi045-A |  | M | 80.32 | White<br>Scottish | N/A | N/A |

**Table 2: Characterization and validation**

| <b>Classification</b>                    | <b>Test</b>                                                              | <b>Result</b>                                                                                  | <b>Data</b>                                                                                          |
|------------------------------------------|--------------------------------------------------------------------------|------------------------------------------------------------------------------------------------|------------------------------------------------------------------------------------------------------|
| <b>Morphology</b>                        | Photography of phase contrast.                                           | Normal. Colonies of small rounded cells with large nuclei.                                     | Figure 1; Supplementary Figures 2-24.                                                                |
| <b>Phenotype</b>                         | Qualitative analysis: Immunofluorescence, Alkaline Phosphatase Staining. | OCT3/4+,<br>NANOG+,<br>SOX2+,<br>TRA-1-60+,<br>TRA-1-81+,<br>SSEA4+,<br>Alkaline Phosphatase+. | Figure 1A,B;<br>Supplementary Figures 2-24A,B.                                                       |
|                                          | Quantitative analysis: Pluritest.                                        | Pluripotency score $\geq 20$ and novelty score $\leq 1.6$ .                                    | Figure 1C;<br>Supplementary Figures 2-24C.                                                           |
| <b>Genotype</b>                          | Karyotype (G-banding).                                                   | Normal XX and XY corresponding to gender (Table 1). Resolution 400 bands.                      | Figure 1D;<br>Supplementary Figures 2-24D.                                                           |
| <b>Identity</b>                          | STR analysis.                                                            | 9 loci tested. 100% match for lines where original PBMCs were available (22/24 lines).         | Available with the authors.                                                                          |
|                                          |                                                                          | N/A                                                                                            | N/A                                                                                                  |
| <b>Mutation analysis (IF APPLICABLE)</b> | Sequencing.                                                              | N/A                                                                                            | N/A                                                                                                  |
|                                          | Southern Blot OR WGS.                                                    | N/A                                                                                            | N/A                                                                                                  |
| <b>Microbiology and virology</b>         | Mycoplasma.                                                              | Negative.                                                                                      | Data available for each line on hPSCreg ( <a href="https://hpscereg.eu/">https://hpscereg.eu/</a> ). |
| <b>Differentiation potential</b>         | TaqMan® hPSC Scorecard™ Assay.                                           | Endoderm, mesoderm, ectoderm negative at day 0, positive at day 14.                            | Figure 1E;<br>Supplementary Figures 2-24E.                                                           |

|                                            |                                     |     |     |
|--------------------------------------------|-------------------------------------|-----|-----|
| <b>Donor screening (OPTIONAL)</b>          | HIV 1 + 2 Hepatitis B, Hepatitis C. | N/A | N/A |
| <b>Genotype additional info (OPTIONAL)</b> | Blood group genotyping.             | N/A | N/A |
|                                            | HLA tissue typing.                  | N/A | N/A |

**Table 3: Reagents details**

| <b>Antibodies used for immunocytochemistry/flow-cytometry</b> |                                                                                                    |                                                |                                                                                                          |
|---------------------------------------------------------------|----------------------------------------------------------------------------------------------------|------------------------------------------------|----------------------------------------------------------------------------------------------------------|
|                                                               | <b>Antibody</b>                                                                                    | <b>Dilution</b>                                | <b>Company Cat # and RRID</b>                                                                            |
| Pluripotency Markers                                          | SSEA4 (mIgG3)                                                                                      | 1:250                                          | Stemgent (cat. 09-0006, RRID: AB_1512169)                                                                |
|                                                               | TRA-1-60 (mIgM, <sub>K</sub> )                                                                     | 1:250                                          | Stemgent (cat. 09-0010, RRID: AB_1512170)                                                                |
|                                                               | TRA-1-81 (mIgM, <sub>K</sub> )                                                                     | 1:250                                          | Stemgent (cat. 09-0011, RRID: AB_1512171)                                                                |
|                                                               | OCT4 (Rabbit, IgG)                                                                                 | 1:250                                          | Stemgent (cat. 09-0023, RRID: AB_2167689)                                                                |
|                                                               | NANOG (Rabbit, IgG)                                                                                | 1:250                                          | Stemgent (cat. 09-0020, RRID: AB_2298294)                                                                |
|                                                               | SOX2 (Rabbit, IgG)                                                                                 | 1:250                                          | Stemgent (cat. 09-0024, RRID: AB_2195775)                                                                |
| N/A                                                           | N/A                                                                                                | N/A                                            | N/A                                                                                                      |
| Secondary antibodies                                          | Donkey anti-Mouse IgG AF488<br>Donkey anti-Rabbit IgG AF594<br>Goat anti-Mouse IgG, IgM, IgA AF488 | 1:500                                          | Life Technologies (cat. A-21202)<br>Life Technologies (cat. A-21207)<br>Life Technologies (cat. A-10667) |
| <b>Primers</b>                                                |                                                                                                    |                                                |                                                                                                          |
|                                                               | <b>Target</b>                                                                                      | <b>Forward/Reverse primer (5'-3')</b>          |                                                                                                          |
| Episomal Plasmids (qPCR)                                      | Epstein-Barr virus nuclear antigen (EBNA)                                                          | GGTCCCGAGAATCCCCATCC/<br>TTCATGGTCGCTGTCAGACAG |                                                                                                          |
| N/A                                                           | N/A                                                                                                | N/A                                            |                                                                                                          |
| House-Keeping Genes (qPCR)                                    | Glyceraldehyde 3-phosphate dehydrogenase (GAPDH)                                                   | GTGGACCTGACCTGCCGTCT/<br>GGAGGAGTGGGTGTCGCTGT  |                                                                                                          |
| N/A                                                           | N/A                                                                                                | N/A                                            |                                                                                                          |
| N/A                                                           | N/A                                                                                                | N/A                                            |                                                                                                          |

**Figure 1: Characterization for iPSC line EDi021-A**



**Figure 1: Characterization for iPSC line EDi021-A**

**A. AP**

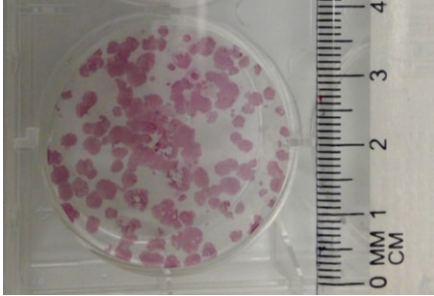

**B. Immunocytochemistry**

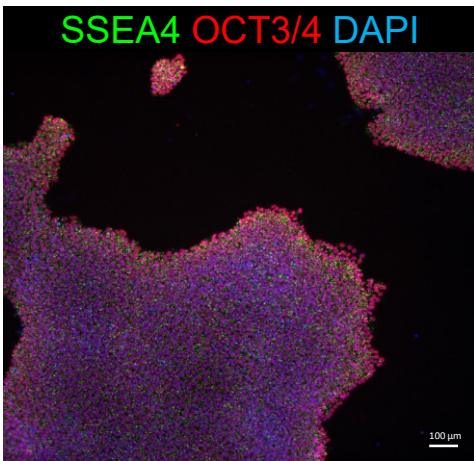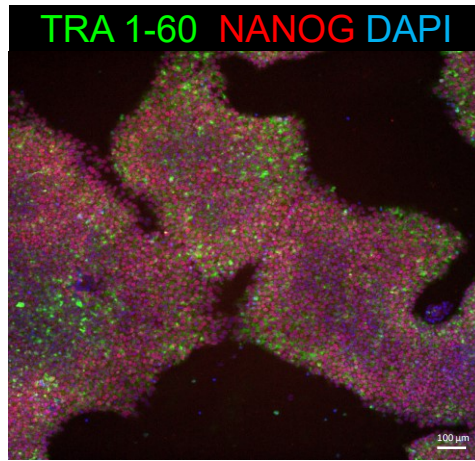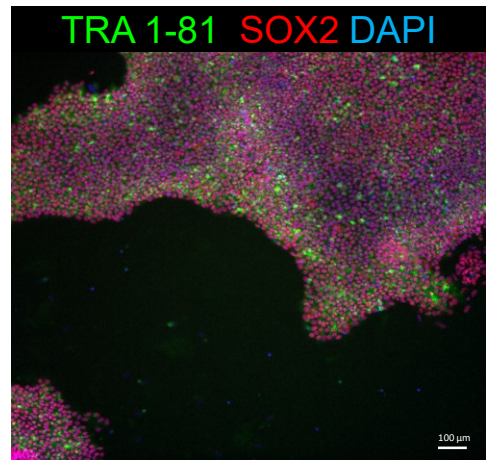

**C. Pluritest**

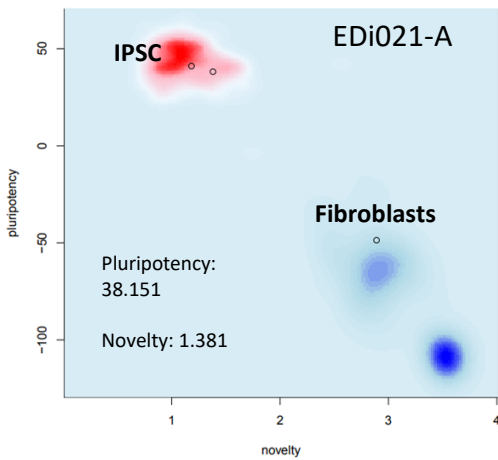

**D. G-Band karyotype**

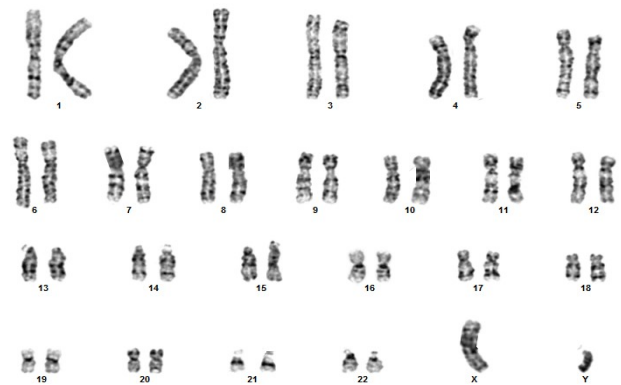

**E. hPSC Scorecard**

| iPSCs      |       |       |       | Embryoid Bodies |      |      |      |
|------------|-------|-------|-------|-----------------|------|------|------|
| Self-renew | Ecto  | Meso  | Endo  | Self-renew      | Ecto | Meso | Endo |
| +          | -     | -     | -     | -               | +    | +    | +    |
| -0.66      | -0.14 | -0.05 | -0.15 | -4.84           | 1.99 | 1.83 | 0.65 |
