# Supplementary material for: Generation of twenty four induced pluripotent stem cell lines from twenty four members of the Lothian Birth Cohort 1936
Source: bioRxiv or medRxiv preprint supplement (doi:10.1101/2020.02.05.935213), 2020-02-05
Supplement: Supplementary file [file media-1.pdf]

# Selection of iPSC line donors based on cognitive ageing

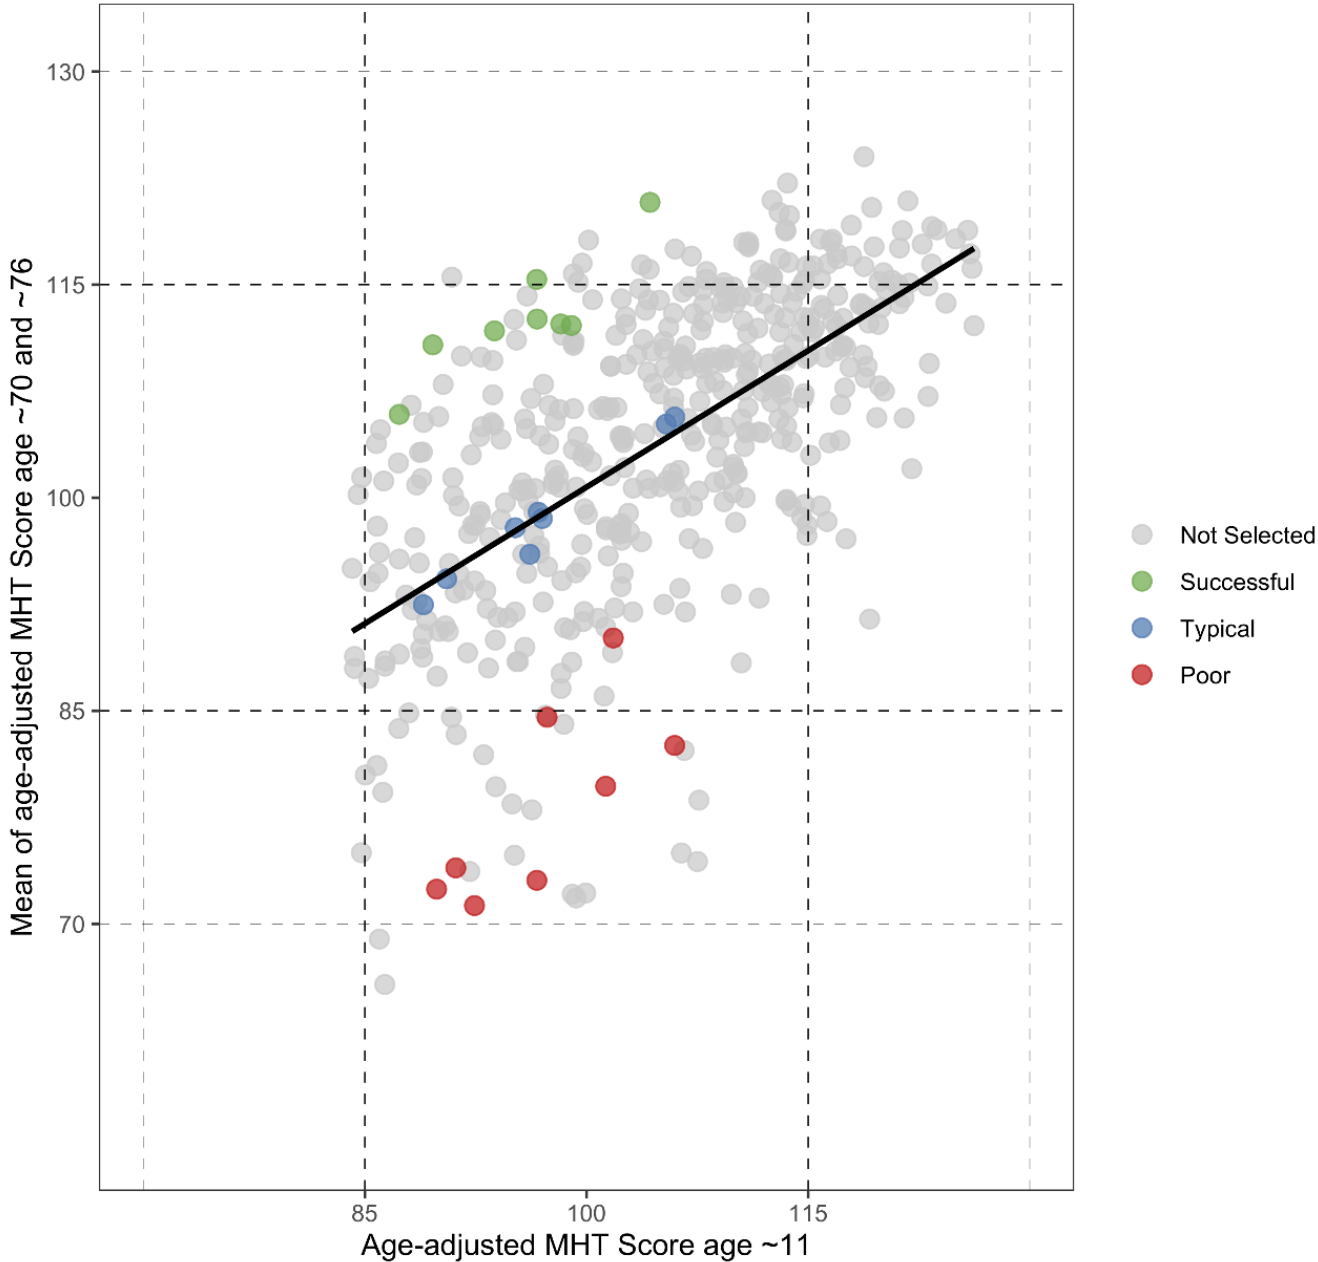

**sFig1:** Selection of iPSC candidates based on cognitive ageing profiles in the Lothian Birth Cohort 1936. Dashed lines are added to show  $\pm 1$ SD from the mean for the age 11 Moray House Test (MHT) score and  $\pm 1$  and 2SDs from the mean for later-life MHT score.

# sFig2. Characterization for iPSC line EDi022-A

## A. AP

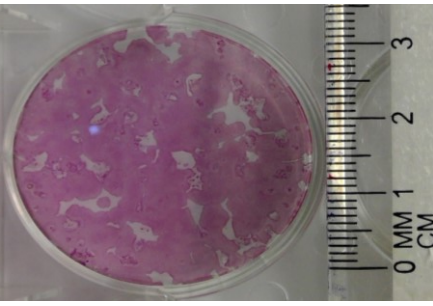

## B. Immunocytochemistry

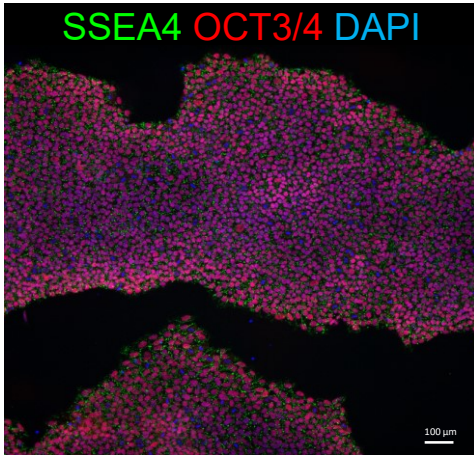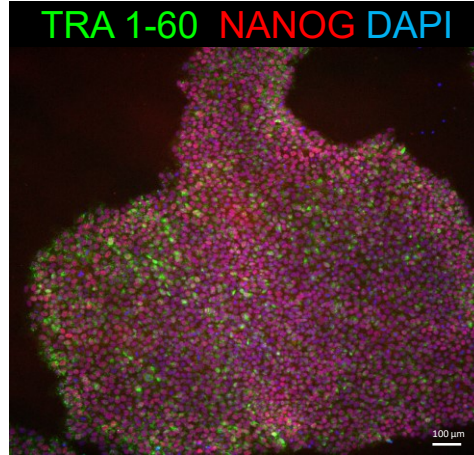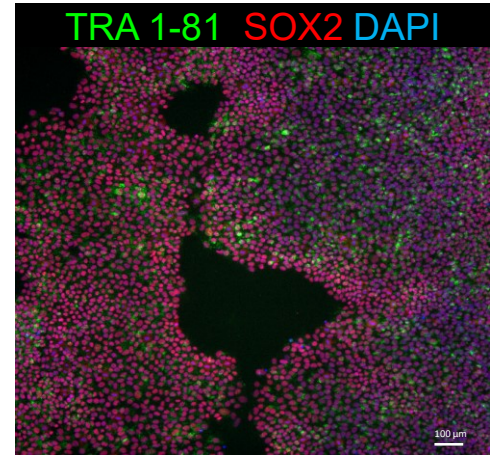

## C. PluriTest

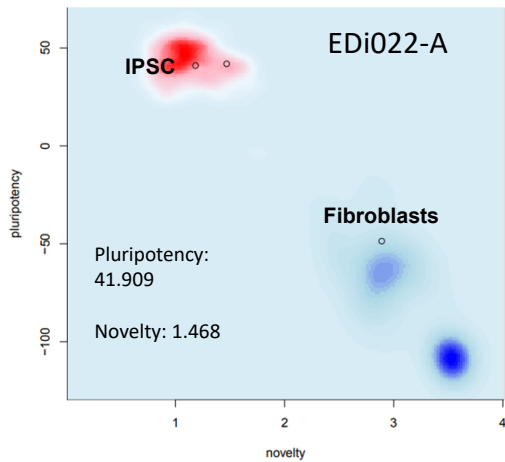

## D. G-Band karyotype

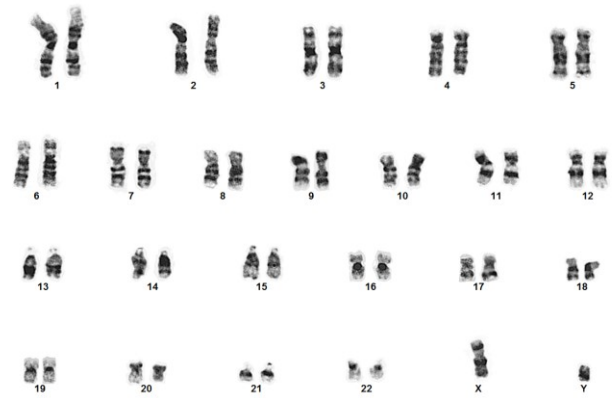

## E. hPSC Scorecard

| iPSCs      |       |      |       | Embryoid bodies |      |      |       |
|------------|-------|------|-------|-----------------|------|------|-------|
| Self-renew | Ecto  | Meso | Endo  | Self-renew      | Ecto | Meso | Endo  |
| +          | -     | -    | -     | -               | +    | ○    | -     |
| 0.29       | -0.10 | 0.62 | -0.53 | -3.06           | 1.41 | 0.76 | -0.32 |

# sFig3: Characterization for iPSC line EDi023-A

## A. AP

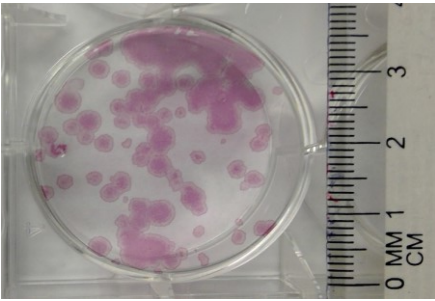

## B. Immunocytochemistry

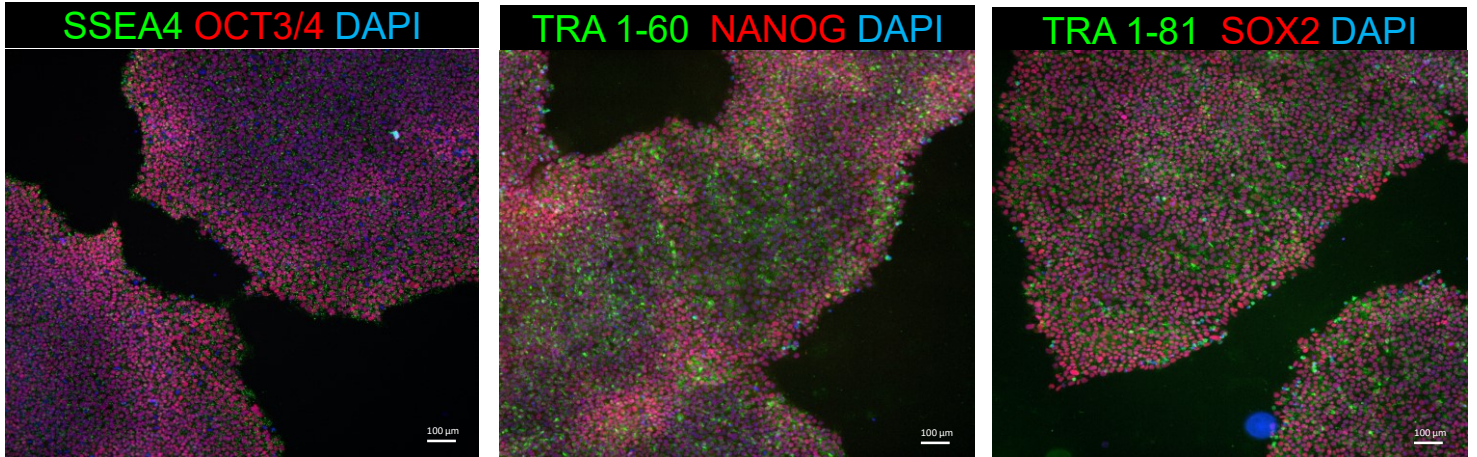

## C. PluriTest

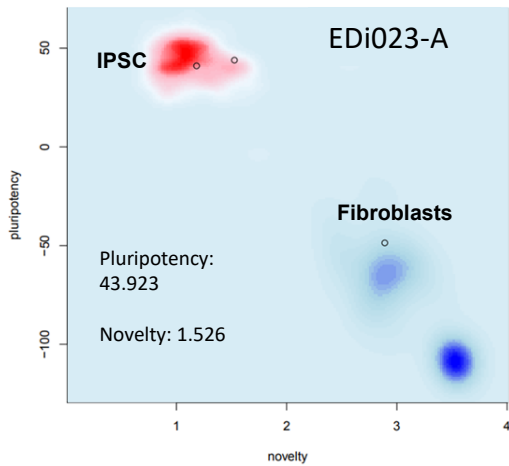

## D. G-Band karyotype

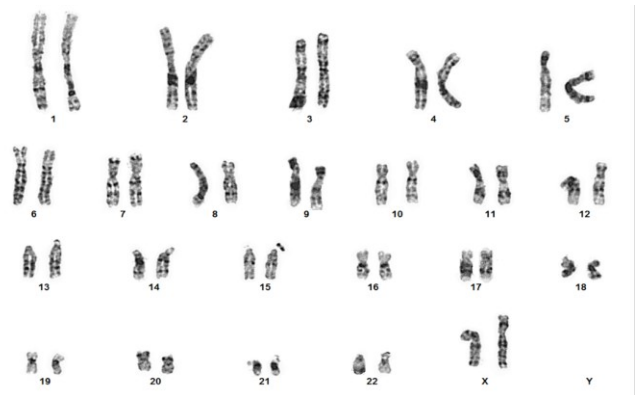

## E. hPSC Scorecard

| iPSCs      |       |      |       | Embryoid bodies |      |      |      |
|------------|-------|------|-------|-----------------|------|------|------|
| Self-renew | Ecto  | Meso | Endo  | Self-renew      | Ecto | Meso | Endo |
| +          | -     | -    | -     | -               | +    | +    | +    |
| 0.28       | -0.30 | 0.34 | -0.67 | -3.49           | 2.38 | 3.38 | 1.12 |

# sFig4: Characterization for iPSC line EDi025-A

## A. AP

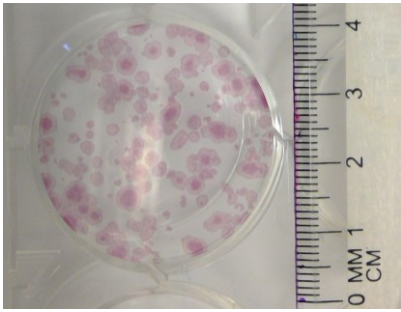

## B. Immunocytochemistry

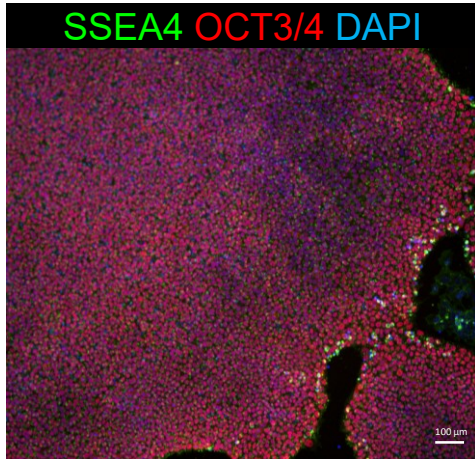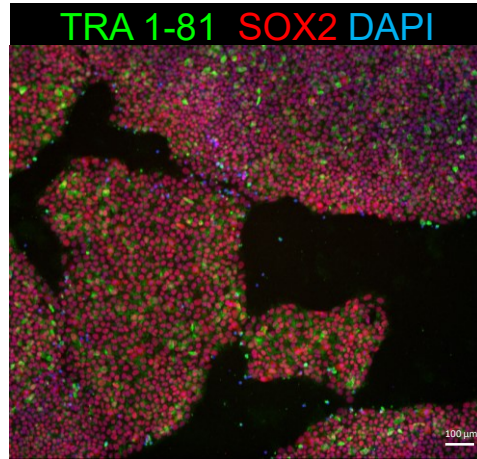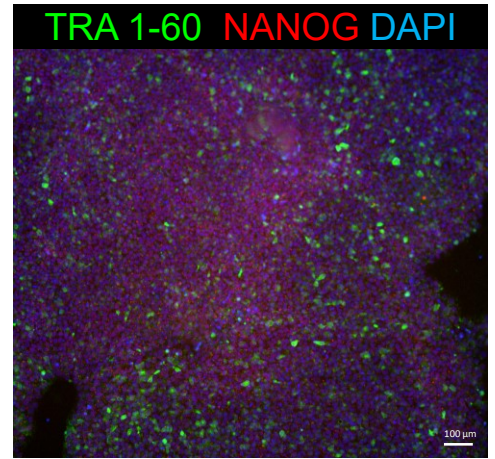

## C. PluriTest

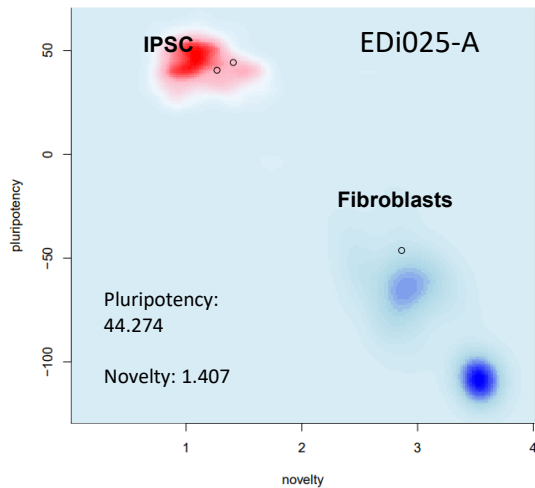

## D. G-Band karyotype

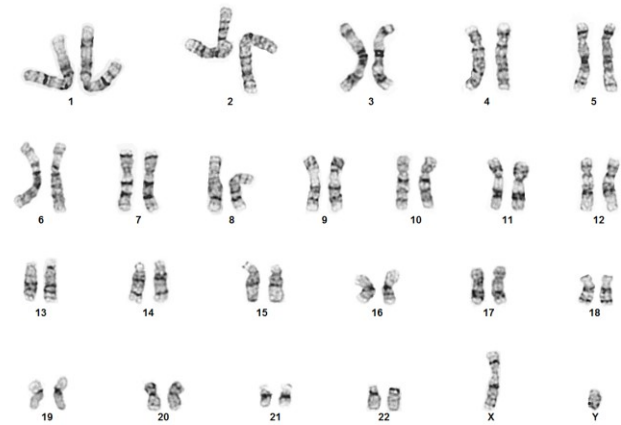

## E. hPSC Scorecard

| iPSCs      |       |       |       | Embryoid Bodies |      |      |      |
|------------|-------|-------|-------|-----------------|------|------|------|
| Self-renew | Ecto  | Meso  | Endo  | Self-renew      | Ecto | Meso | Endo |
| +          | -     | -     | -     | -               | +    | +    | +    |
| -0.01      | -0.33 | -0.39 | -1.15 | -7.29           | 1.49 | 2.19 | 0.57 |

# sFig5: Characterization for iPSC line EDi026-A

## A. AP

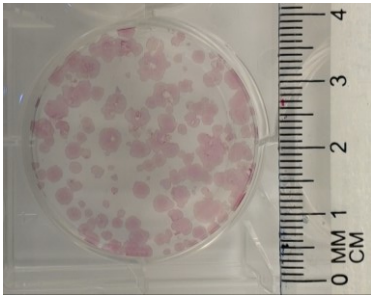

## B. Immunocytochemistry

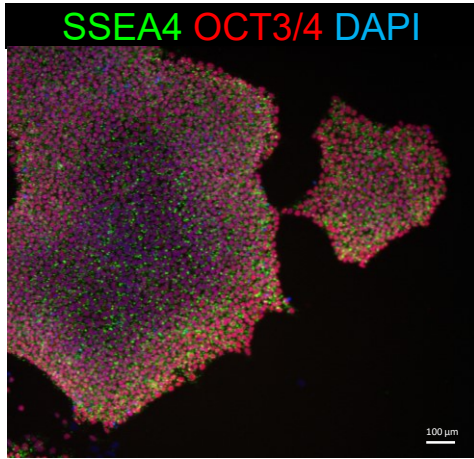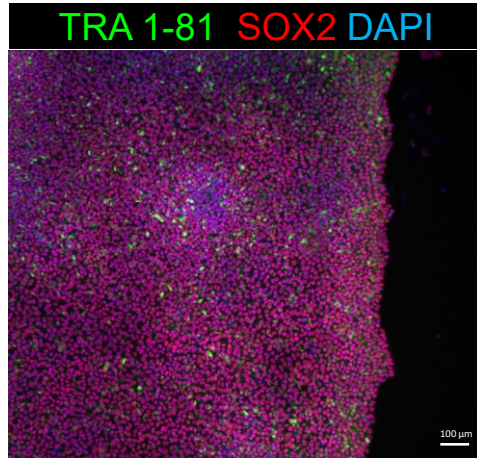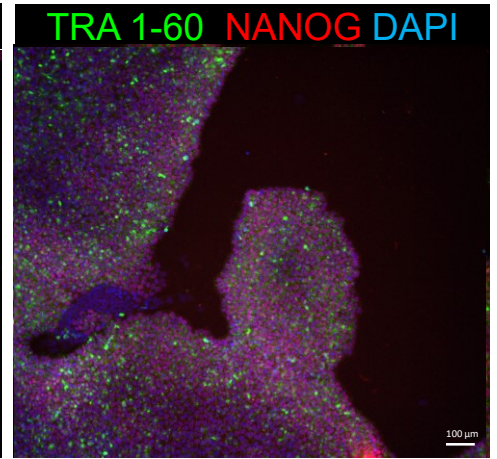

## C. Pluritest

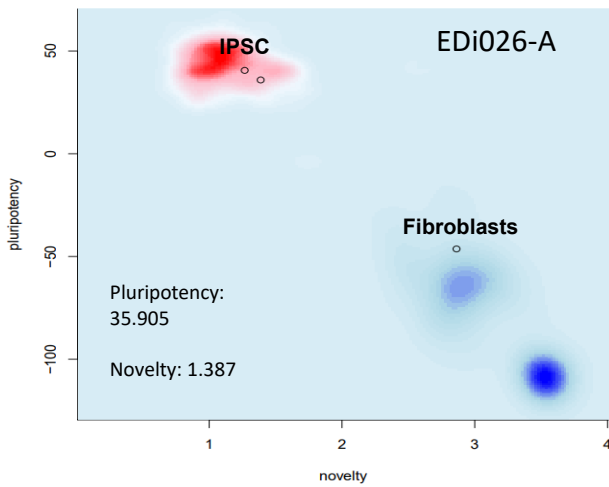

## D. G-Band karyotype

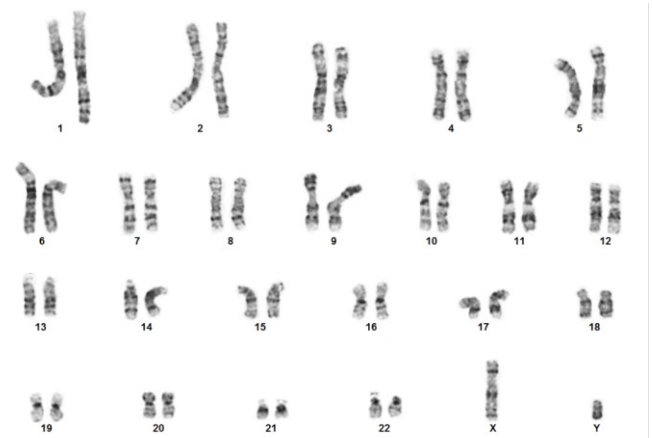

## E. hPSC Scorecard

| iPSCs      |      |      |       | Embryoid Bodies |      |      |      |
|------------|------|------|-------|-----------------|------|------|------|
| Self-renew | Ecto | Meso | Endo  | Self-renew      | Ecto | Meso | Endo |
| +          | -    | -    | -     | -               | +    | +    | +    |
| -0.41      | 0.50 | 0.42 | -0.83 | -6.72           | 1.74 | 1.19 | 0.69 |

# sFig6: Characterization for iPSC line EDi027-A

## A. AP

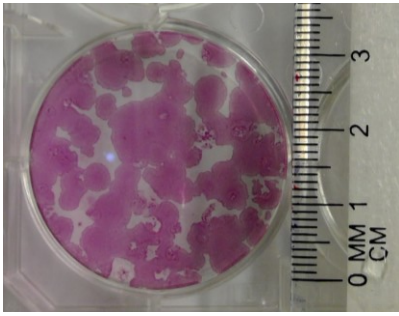

## B. Immunocytochemistry

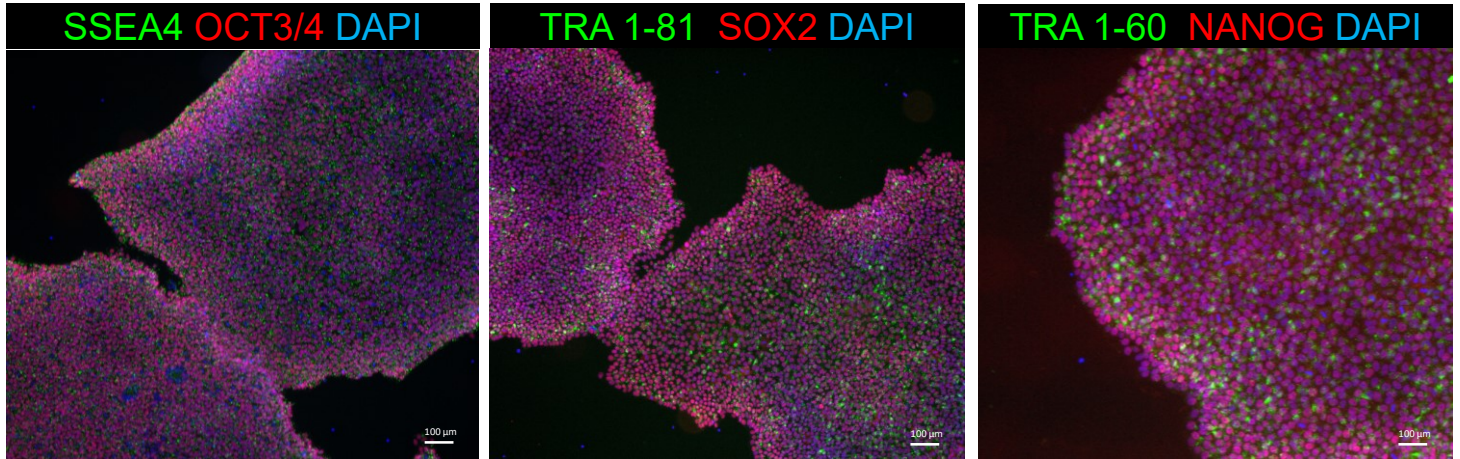

## C. Pluritest

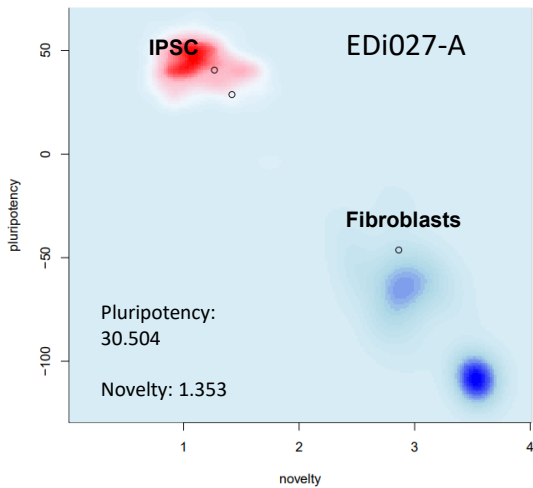

## D. G-Band karyotype

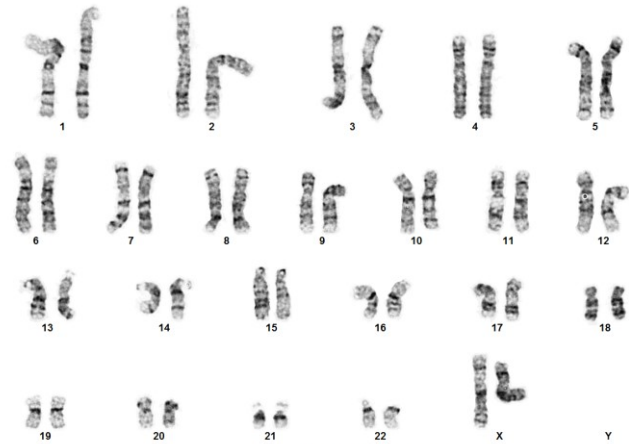

## E. hPSC Scorecard

| iPSCs      |      |      |       | Embryoid Bodies |       |       |       |
|------------|------|------|-------|-----------------|-------|-------|-------|
| Self-renew | Ecto | Meso | Endo  | Self-renew      | Ecto  | Meso  | Endo  |
| +          | ○    | -    | -     | -               | +     | +     | +     |
| 0.18       | 0.61 | 0.10 | -0.75 | -6.07           | -1.72 | -3.29 | -1.78 |

# sFig7: Characterization for iPSC line EDi028-A

## A. AP

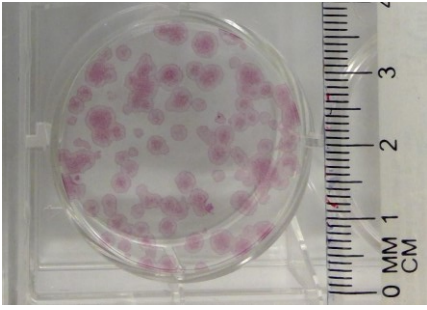

## B. Immunocytochemistry

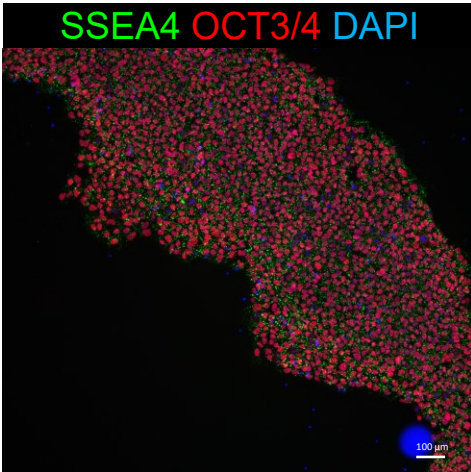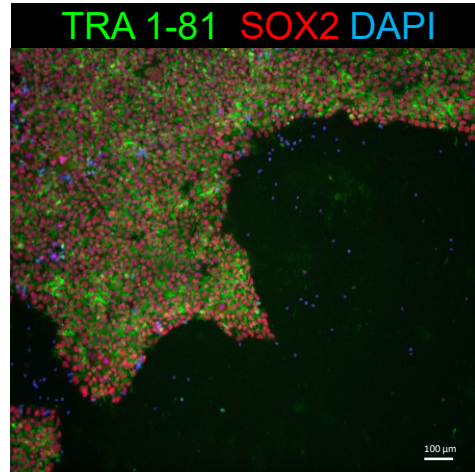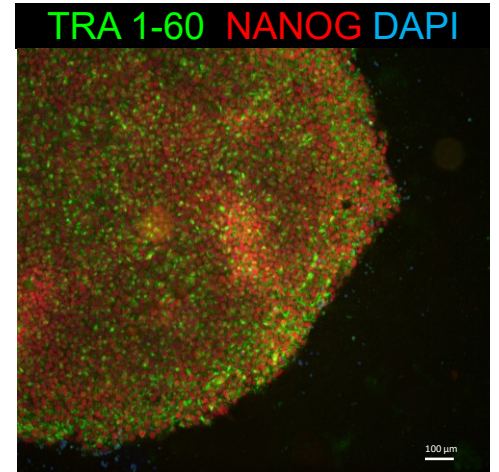

## C. Pluritest

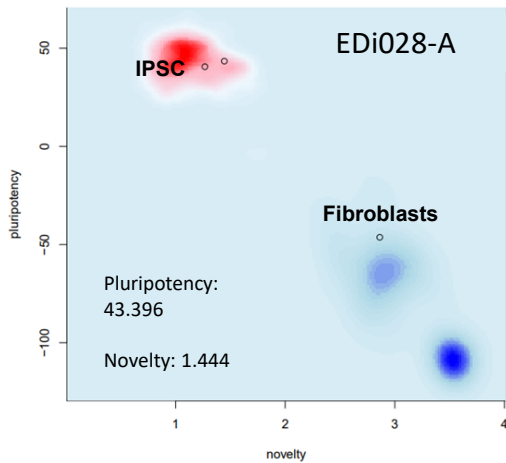

## D. G -Band karyotype

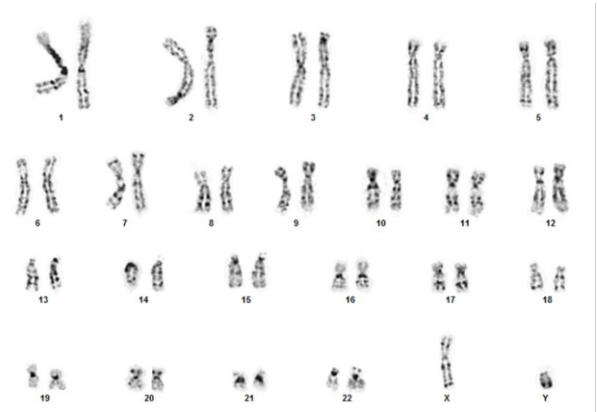

## E. hPSC Scorecard

| iPSCs      |       |      |       | Embryoid Bodies |      |      |      |
|------------|-------|------|-------|-----------------|------|------|------|
| Self-renew | Ecto  | Meso | Endo  | Self-renew      | Ecto | Meso | Endo |
| +          | -     | -    | -     | -               | +    | +    | +    |
| -0.17      | -0.17 | 0.69 | -1.00 | -6.84           | 2.14 | 2.10 | 0.69 |

# sFig8: Characterization for iPSC line EDi029-A

## A. AP

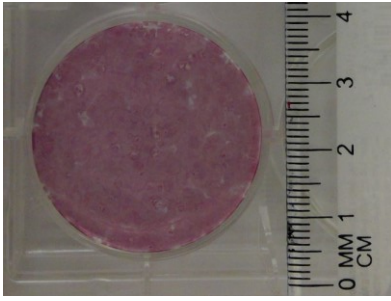

## B. Immunocytochemistry

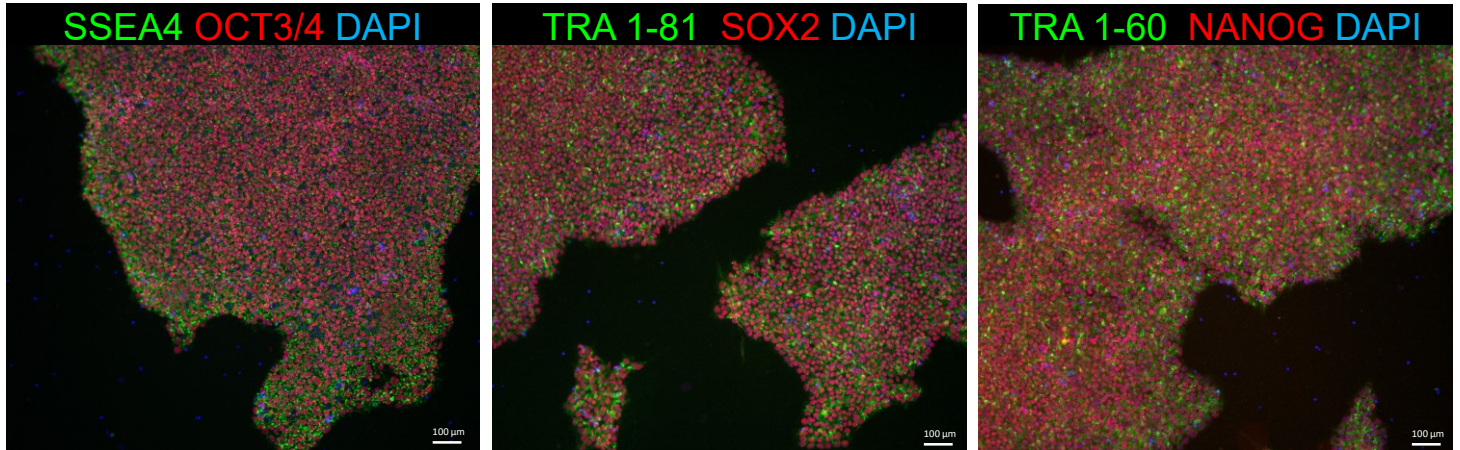

## C. Pluritest

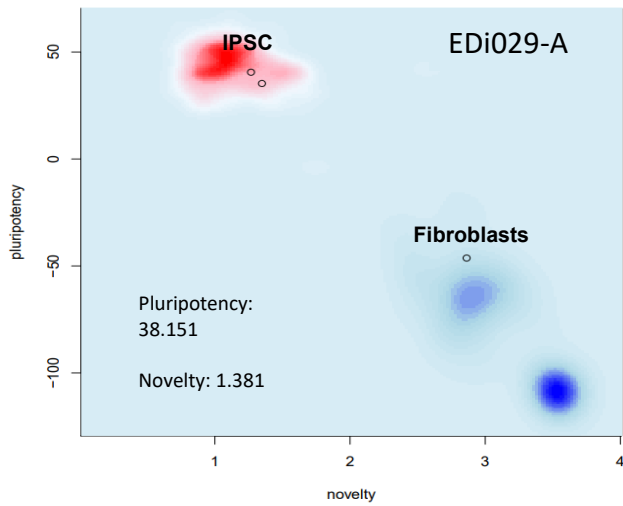

## D. G-Band karyotype

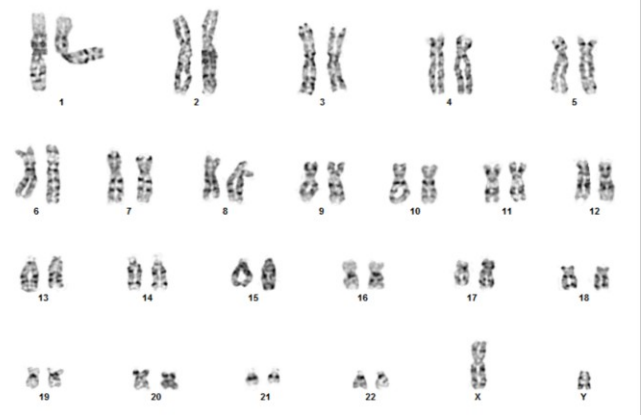

## E. hPSC Scorecard

| iPSCs      |      |      |       | Embryoid Bodies |      |      |      |
|------------|------|------|-------|-----------------|------|------|------|
| Self-renew | Ecto | Meso | Endo  | Self-renew      | Ecto | Meso | Endo |
| +          | -    | -    | -     | -               | +    | +    | +    |
| 0.75       | 0.33 | 0.37 | -0.81 | -5.16           | 2.13 | 3.91 | 1.96 |



# sFig9: Characterization for iPSC line EDi030-A

## A. AP

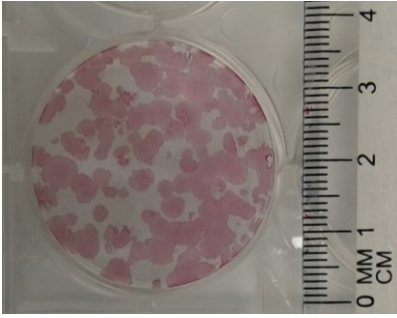

## B. Immunocytochemistry

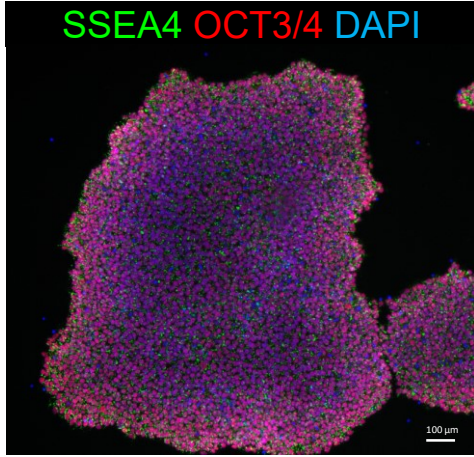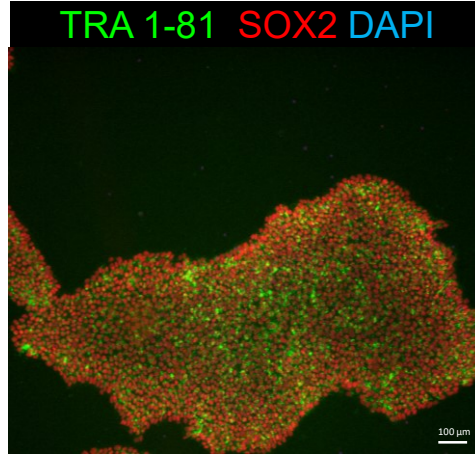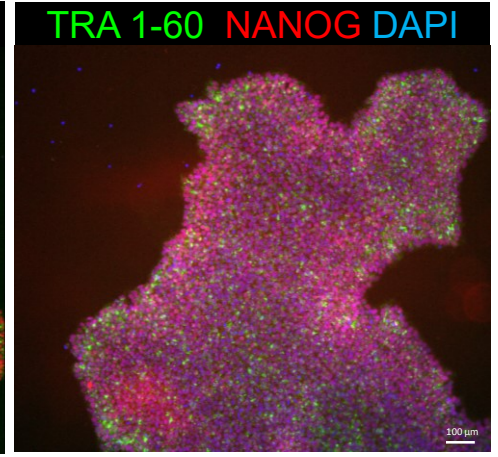

## C. Pluritest

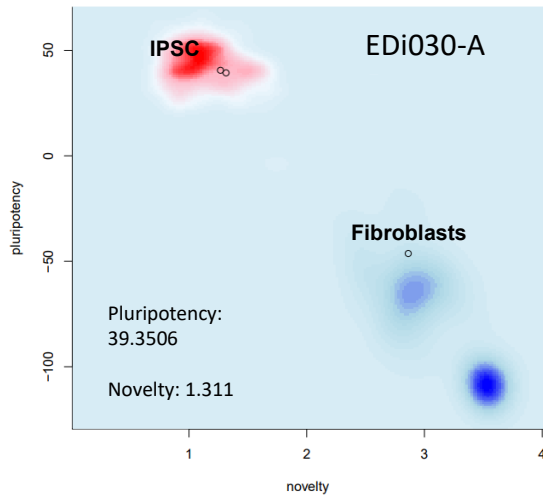

## D. G-Band karyotype

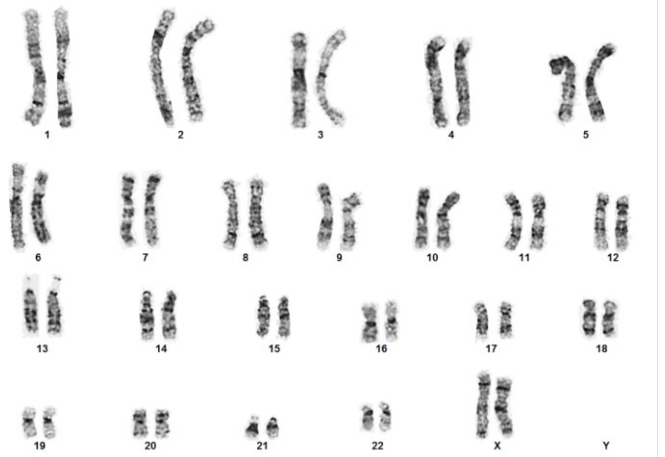

## E. hPSC Scorecard

| iPSCs      |      |      |       | Embryoid Bodies |      |      |      |
|------------|------|------|-------|-----------------|------|------|------|
| Self-renew | Ecto | Meso | Endo  | Self-renew      | Ecto | Meso | Endo |
| +          | -    | -    | -     | -               | +    | +    | +    |
| -0.30      | 0.07 | 0.54 | -1.48 | -5.34           | 1.72 | 5.14 | 1.95 |

# sFig10: Characterization for iPSC line EDi031-A

## A. AP

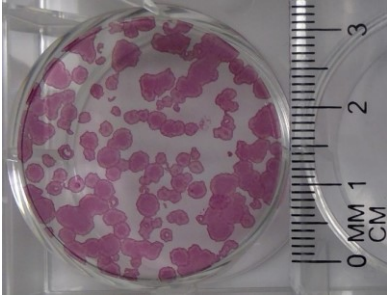

## B. Immunocytochemistry

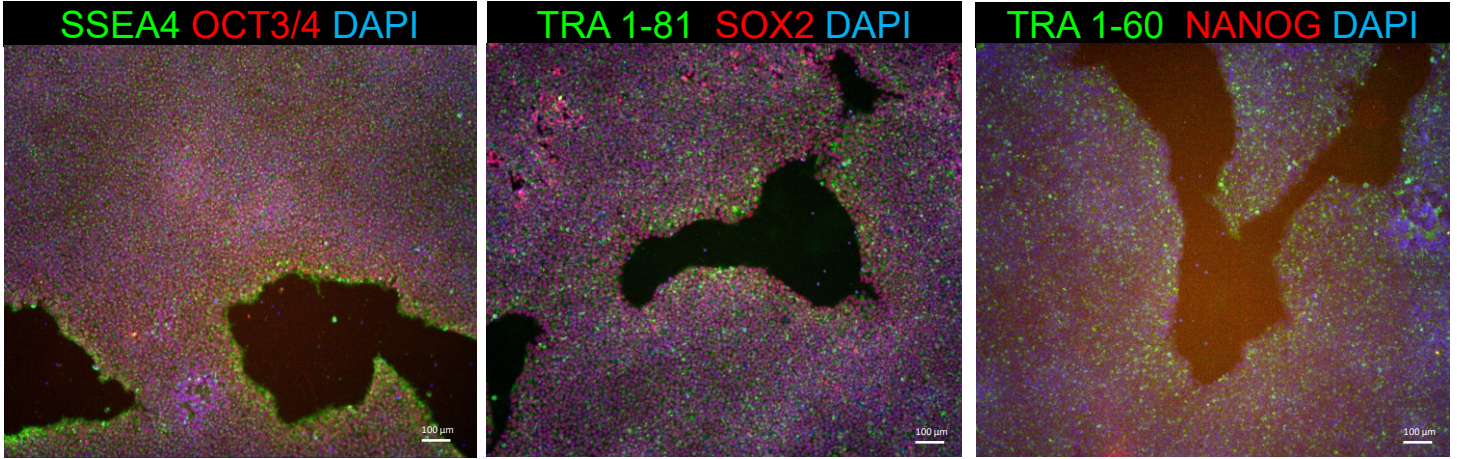

## C. Pluritest

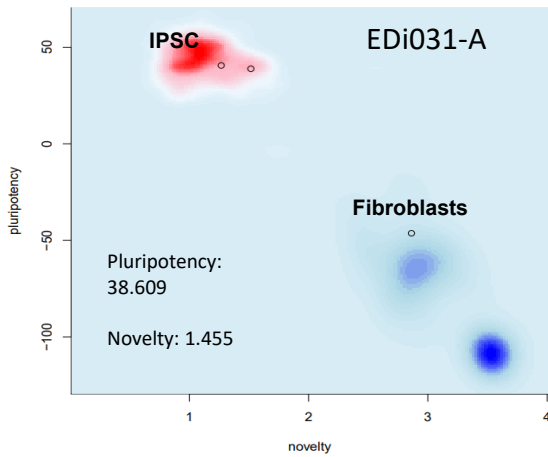

## D. G-Band karyotype

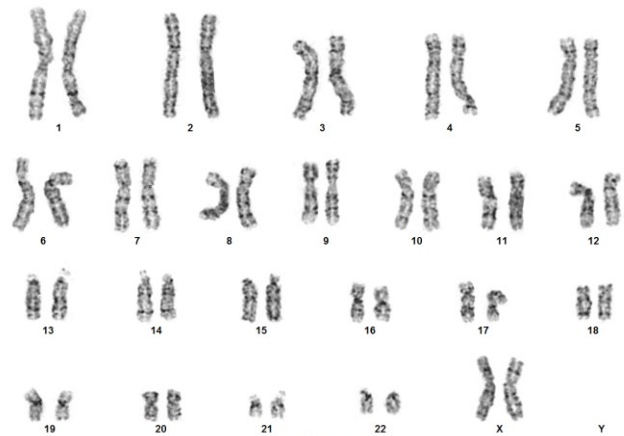

## E. hPSC Scorecard

| iPSCs      |       |       |       | Embryoid Bodies |      |      |      |
|------------|-------|-------|-------|-----------------|------|------|------|
| Self-renew | Ecto  | Meso  | Endo  | Self-renew      | Ecto | Meso | Endo |
| +          | -     | -     | -     | -               | +    | +    | +    |
| -0.19      | -0.46 | -0.24 | -1.30 | -6.33           | 1.77 | 2.65 | 1.65 |

# sFig11: Characterization for iPSC line EDi032-A

## A. AP

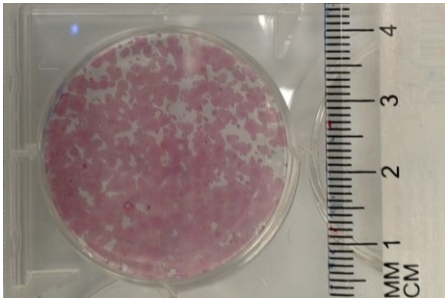

## B. Immunocytochemistry

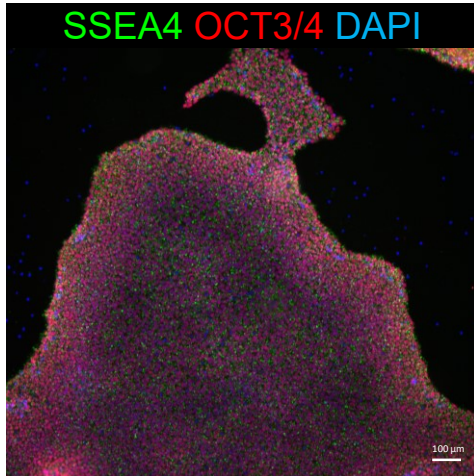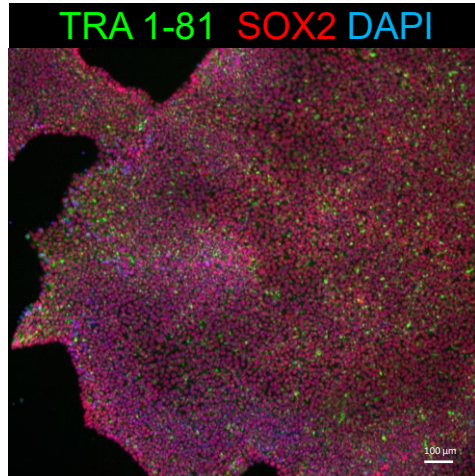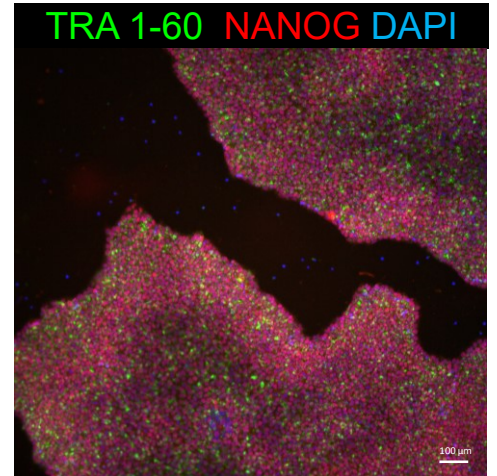

## C. Pluritest

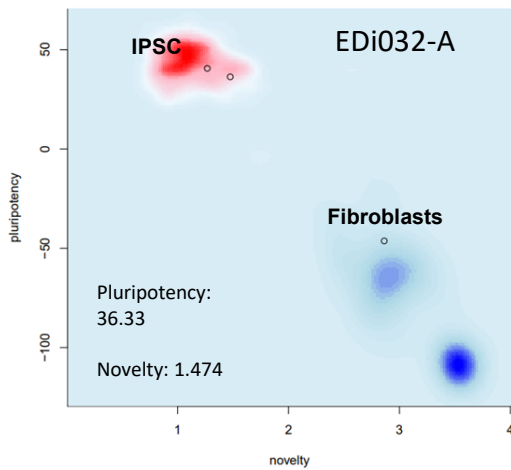

## D. G -Band karyotype

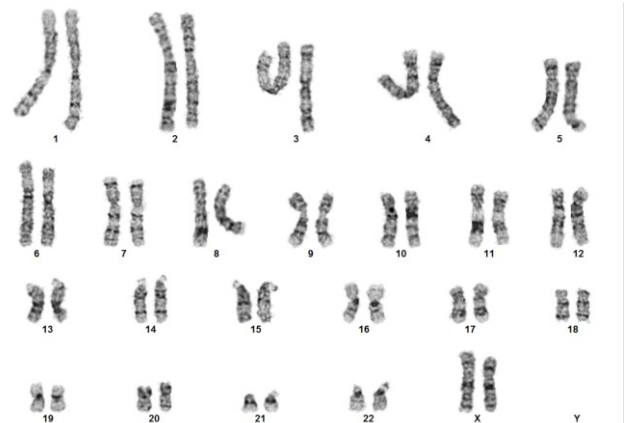

## E. hPSC Scorecard

| IPSCs      |       |      |       | Embryoid Bodies |      |      |      |
|------------|-------|------|-------|-----------------|------|------|------|
| Self-renew | Ecto  | Meso | Endo  | Self-renew      | Ecto | Meso | Endo |
| +          | -     | -    | -     | -               | +    | +    | +    |
| 0.24       | -0.06 | 0.08 | -1.36 | -6.85           | 1.85 | 2.34 | 0.78 |

# sFig12: Characterization for iPSC line EDi033-A

## A. AP

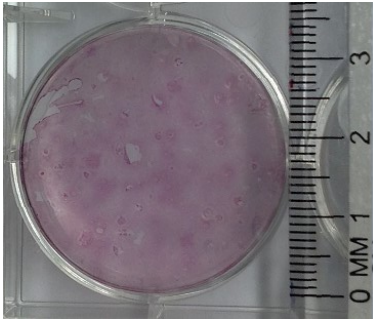

## B. Immunocytochemistry

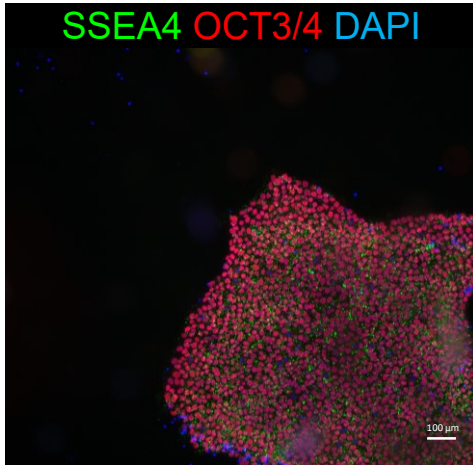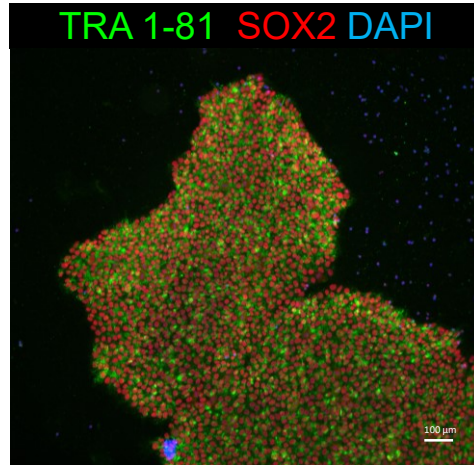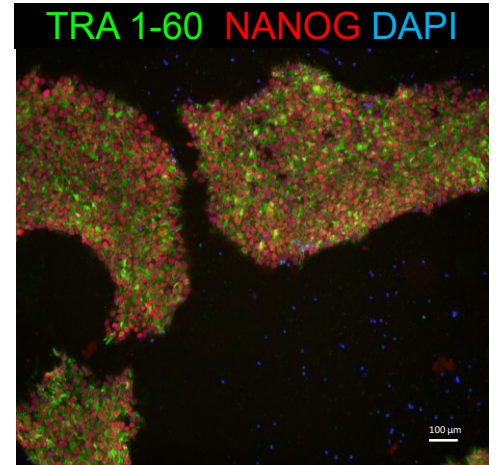

## C. Pluritest

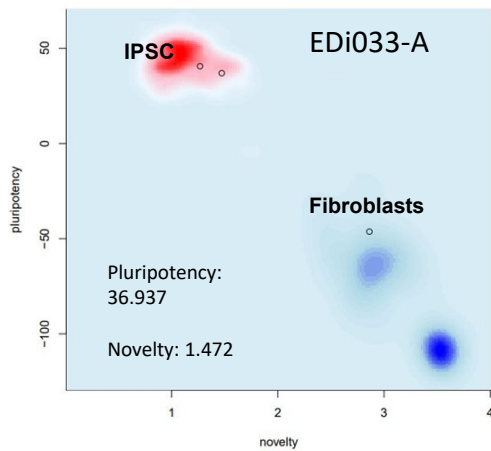

## D. G -Band karyotype

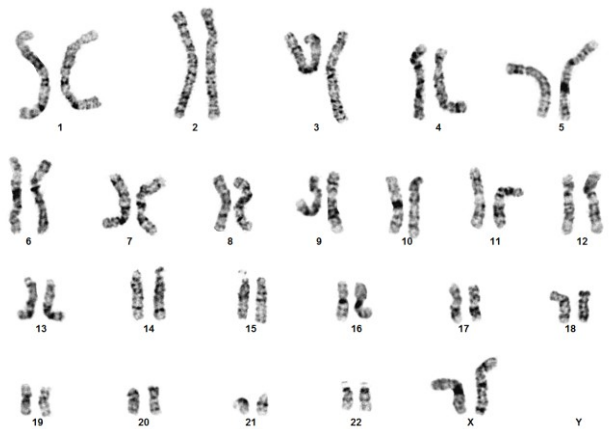

## E. hPSC Scorecard

| IPSCs      |       |       |       | Embryoid Bodies |      |      |      |
|------------|-------|-------|-------|-----------------|------|------|------|
| Self-renew | Ecto  | Meso  | Endo  | Self-renew      | Ecto | Meso | Endo |
| +          | -     | -     | -     | -               | +    | +    | +    |
| 0.23       | -0.02 | -0.18 | -1.03 | -3.58           | 1.77 | 3.93 | 1.85 |

# sFig13: Characterization for iPSC line EDi034-A

## A. AP

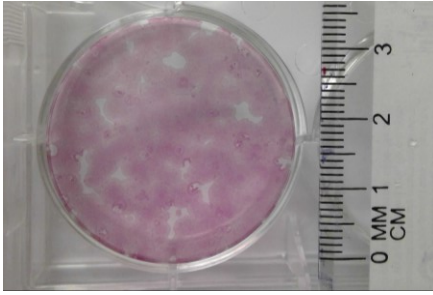

## B. Immunocytochemistry

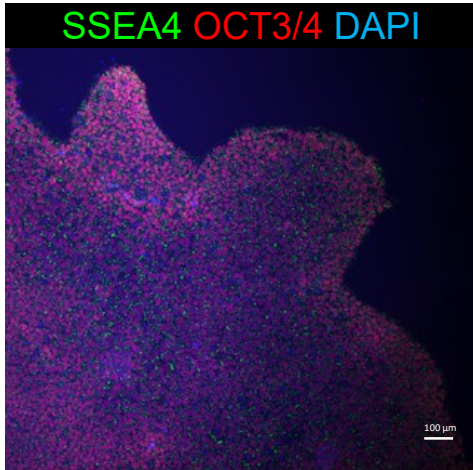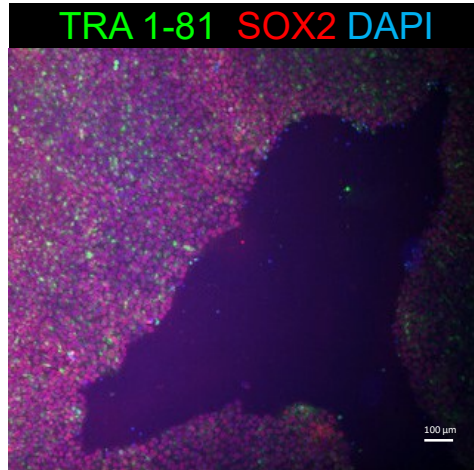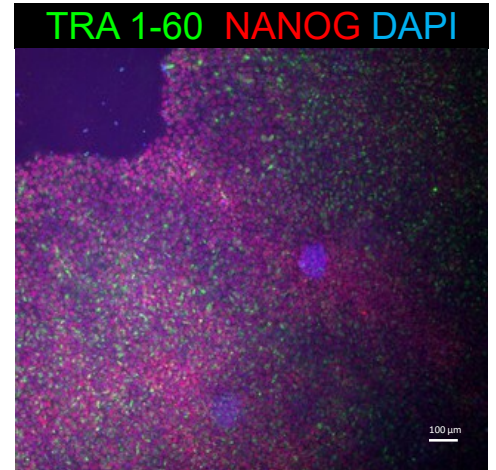

## C. Pluritest

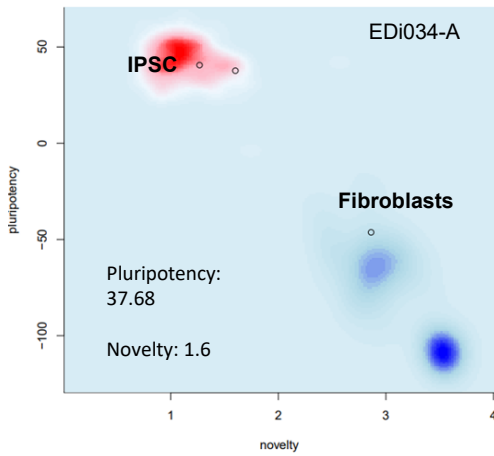

## D. G -Band karyotype

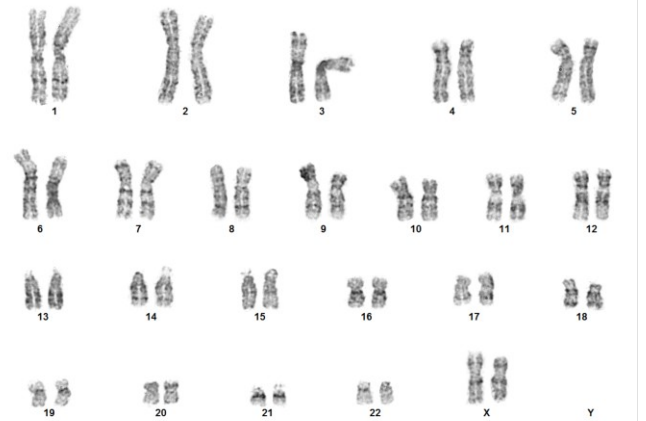

## E. hPSC Scorecard

| iPSCs      |       |       |       | Embryoid Bodies |      |      |      |
|------------|-------|-------|-------|-----------------|------|------|------|
| Self-renew | Ecto  | Meso  | Endo  | Self-renew      | Ecto | Meso | Endo |
| +          | -     | -     | -     | -               | +    | +    | +    |
| 0.77       | -0.25 | -0.22 | -1.57 | -4.24           | 2.56 | 3.43 | 1.67 |

# sFig14: Characterization for iPSC line EDi035-A

## A. AP

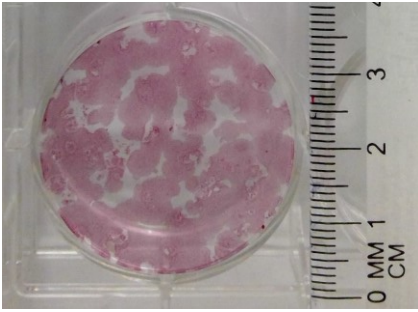

## B. Immunocytochemistry

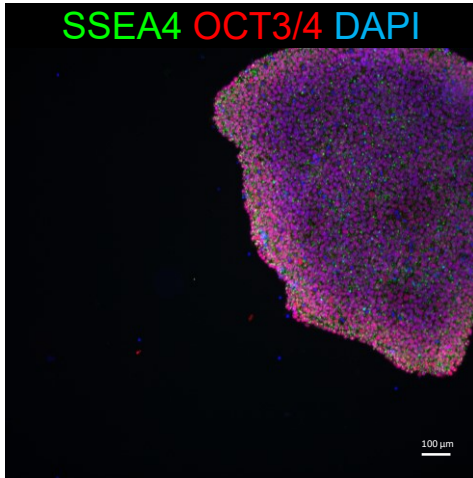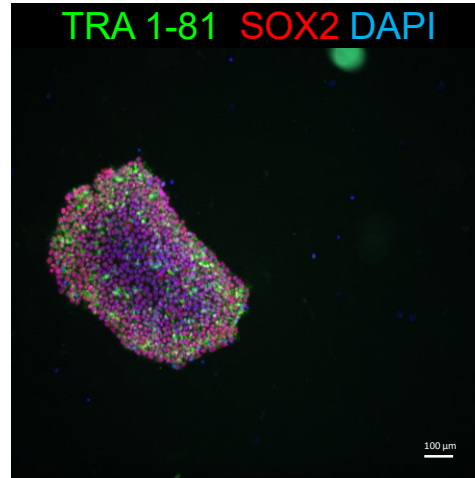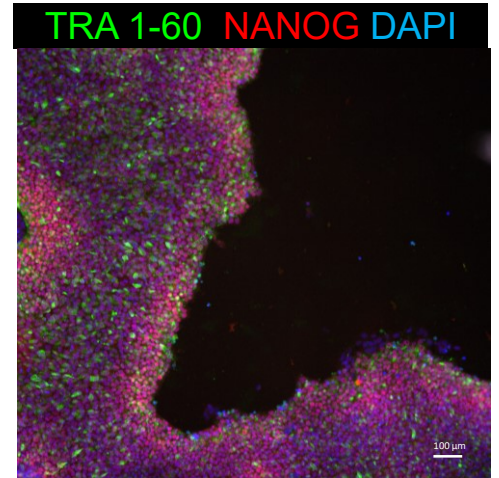

## C. Pluritest

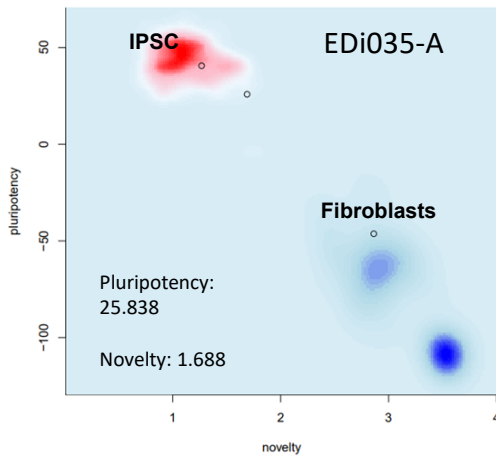

## D. G -Band karyotype

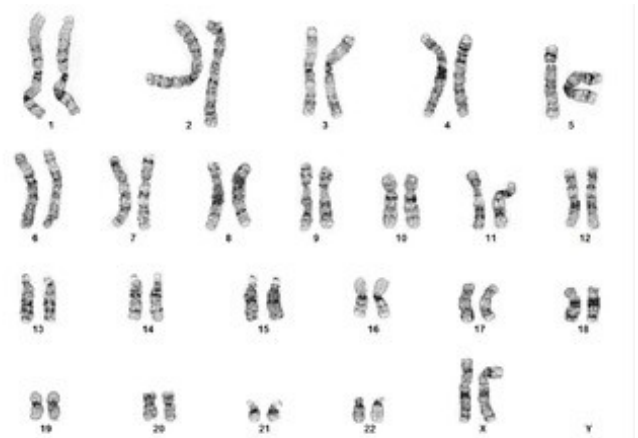

## E. hPSC Scorecard

| iPSCs      |      |      |       | Embryoid Bodies |      |      |      |
|------------|------|------|-------|-----------------|------|------|------|
| Self-renew | Ecto | Meso | Endo  | Self-renew      | Ecto | Meso | Endo |
| +          | -    | -    | -     | -               | +    | -    | ○    |
| 0.39       | 0.19 | 0.02 | -1.22 | -6.69           | 1.81 | 0.64 | 0.29 |

# sFig15: Characterization for iPSC line EDi036-A

## A. AP

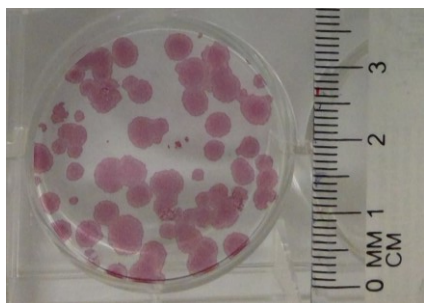

## B. Immunocytochemistry

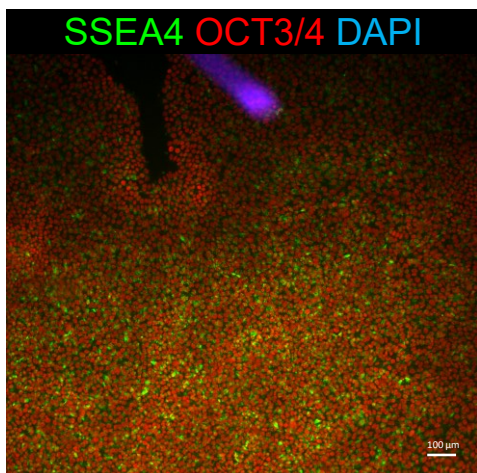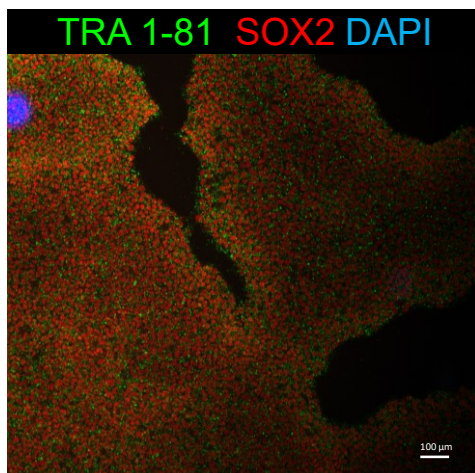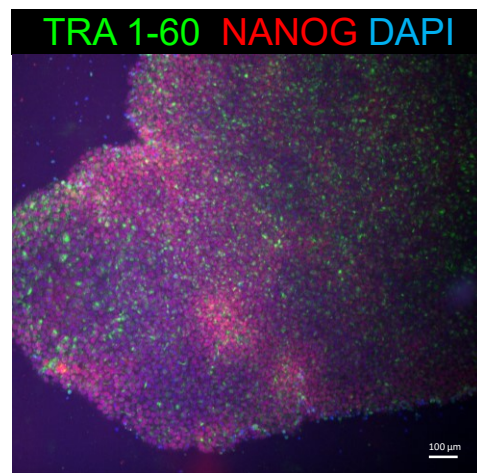

## C. Pluritest

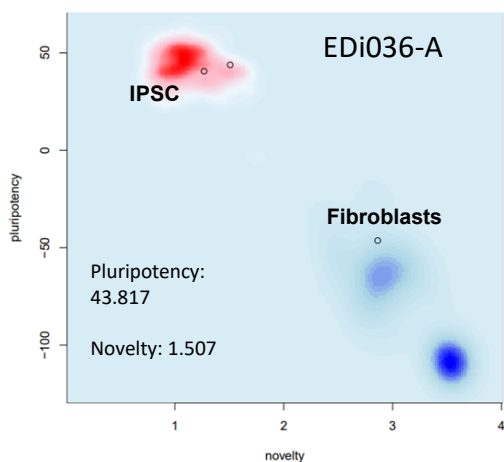

## D. G -Band karyotype

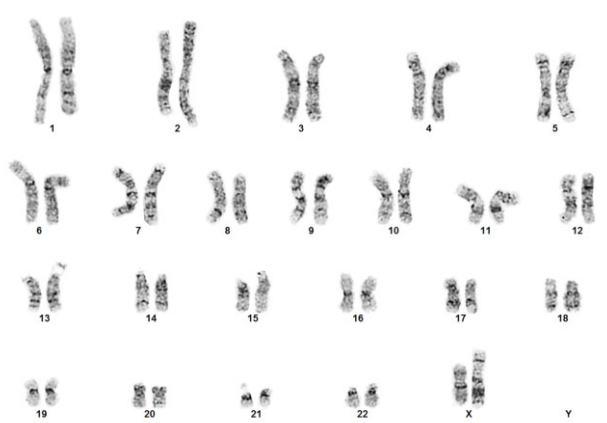

## E. hPSC Scorecard

| iPSCs      |      |      |       | Embryoid Bodies |      |      |      |
|------------|------|------|-------|-----------------|------|------|------|
| Self-renew | Ecto | Meso | Endo  | Self-renew      | Ecto | Meso | Endo |
| +          | -    | -    | -     | -               | +    | +    | +    |
| 0.50       | 0.37 | 0.20 | -1.03 | -6.35           | 1.90 | 1.61 | 0.66 |

# sFig16: Characterization for iPSC line EDi037-A

## A. AP

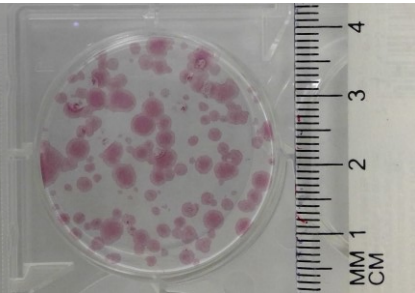

## B. Immunocytochemistry

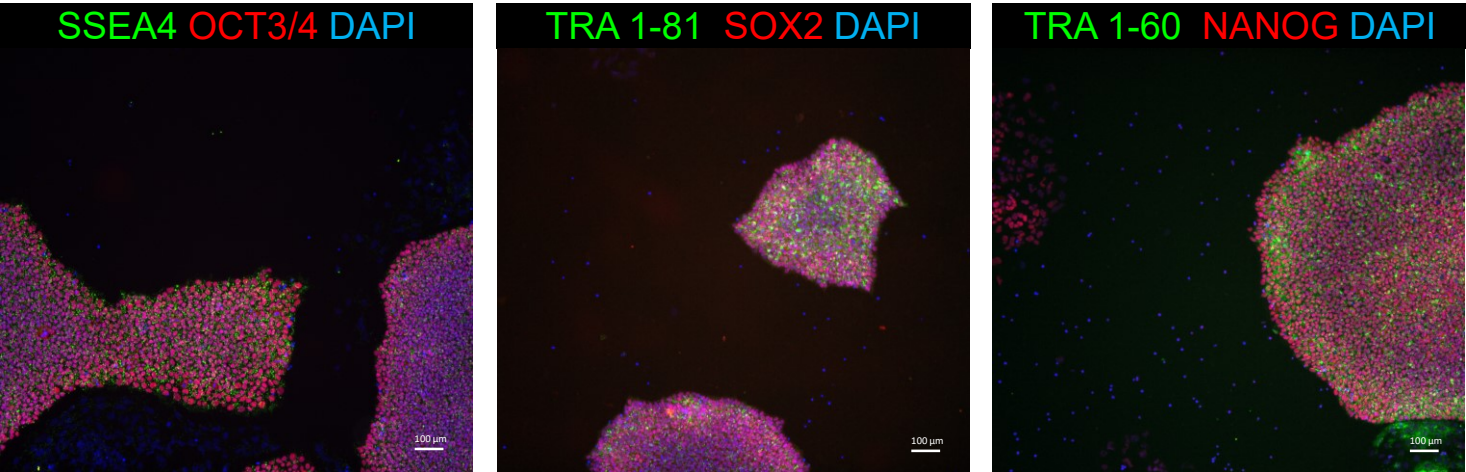

## C. Pluritest

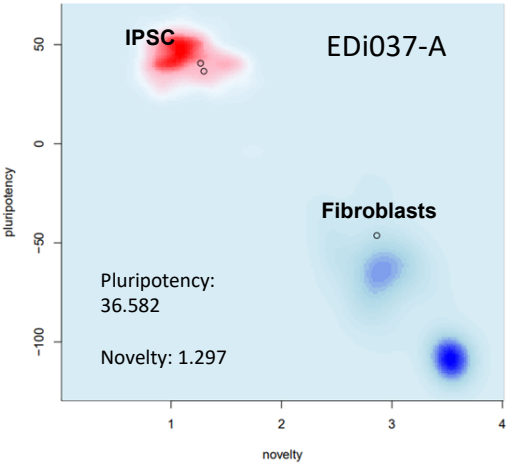

## D. G -Band karyotype

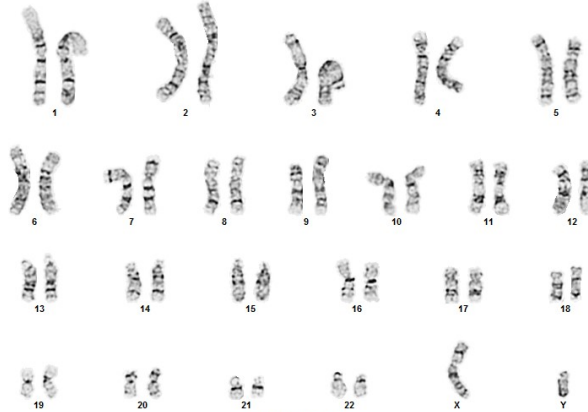

## E. hPSC Scorecard

| iPSCs      |      |      |       | Embryoid Bodies |      |      |      |
|------------|------|------|-------|-----------------|------|------|------|
| Self-renew | Ecto | Meso | Endo  | Self-renew      | Ecto | Meso | Endo |
| +          | -    | -    | -     | -               | +    | +    | +    |
| 0.05       | 0.20 | 0.05 | -0.75 | -7.38           | 1.65 | 1.80 | 0.87 |



# sFig17: Characterization for iPSC line EDi038-A

## A. AP

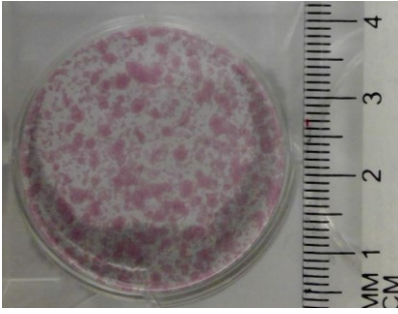

## B. Immunocytochemistry

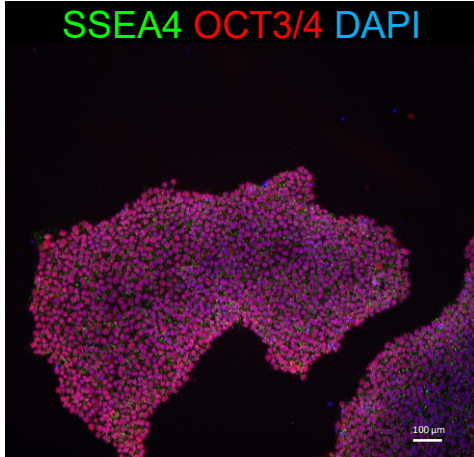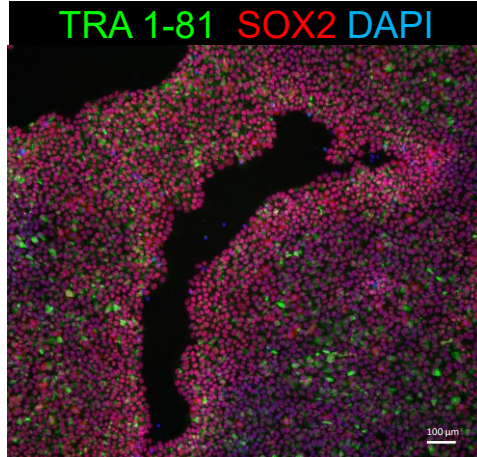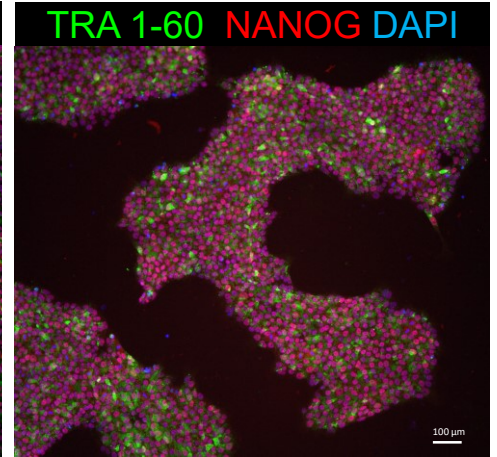

## C. Pluritest

Plot unavailable

Pluripotency:  
48.68024

Novelty:  
1.418005

## D. G-Band karyotype

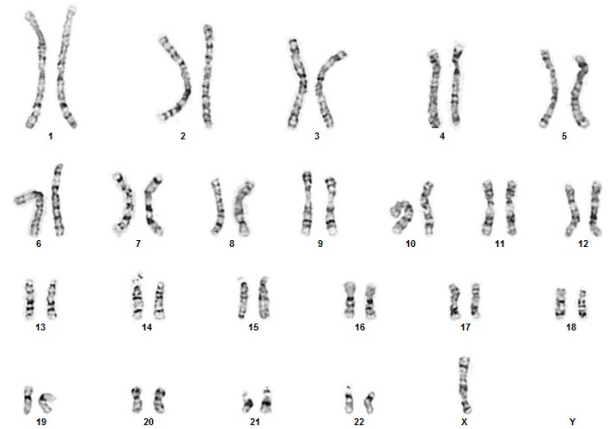

## E. hPSC Scorecard

| iPSCs      |       |      |       | Embryoid Bodies |      |      |      |
|------------|-------|------|-------|-----------------|------|------|------|
| Self-renew | Ecto  | Meso | Endo  | Self-renew      | Ecto | Meso | Endo |
| +          | -     | -    | -     | -               | +    | +    | +    |
| 0.61       | -0.09 | 0.48 | -1.10 | -6.22           | 1.41 | 6.00 | 1.73 |

# sFig18: Characterization for iPSC line EDi039-A

## A. AP

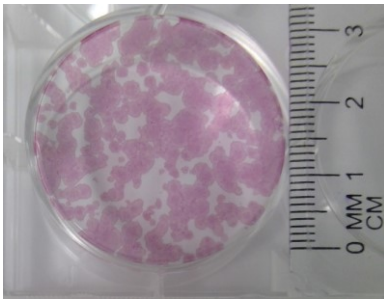

## B. Immunocytochemistry

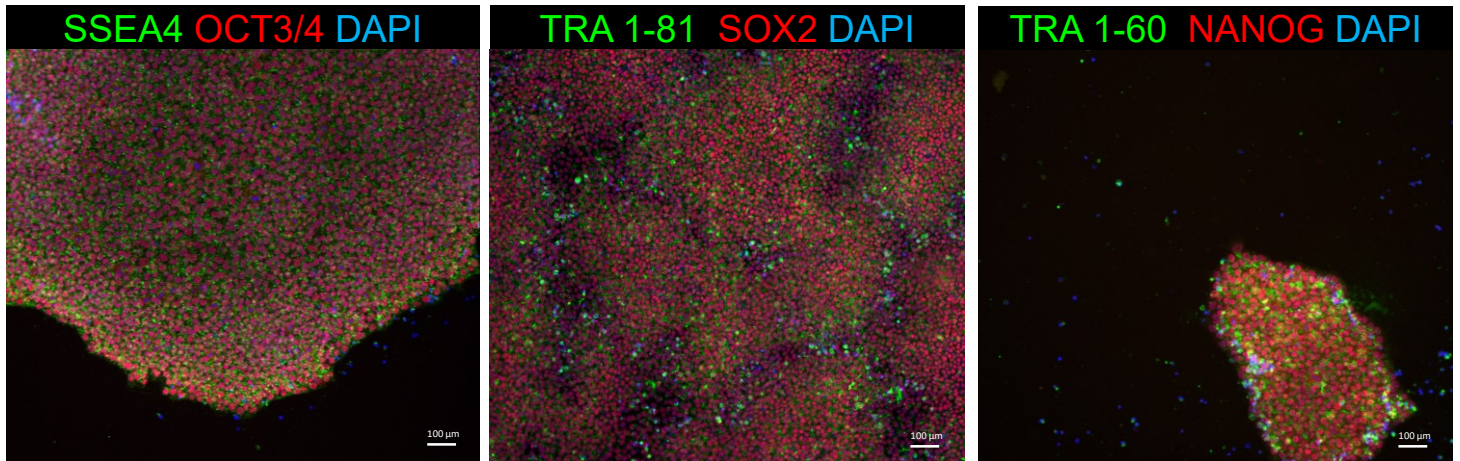

## C. PluriTest

PluriTest not conducted.

## D. G-Band karyotype

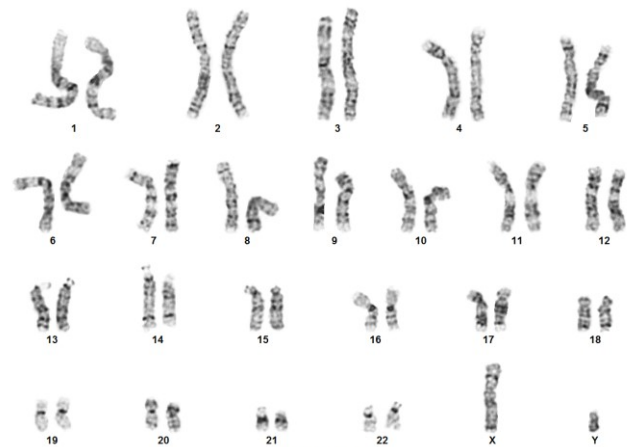

## E. hPSC Scorecard

| iPSCs      |      |       |       | Embryoid Bodies |      |      |      |
|------------|------|-------|-------|-----------------|------|------|------|
| Self-renew | Ecto | Meso  | Endo  | Self-renew      | Ecto | Meso | Endo |
| +          | -    | -     | -     | -               | +    | +    | +    |
| -0.19      | 0.14 | -0.15 | -1.05 | -6.74           | 2.08 | 1.07 | 0.64 |

# sFig19: Characterization for iPSC line EDi040-A

## A. AP

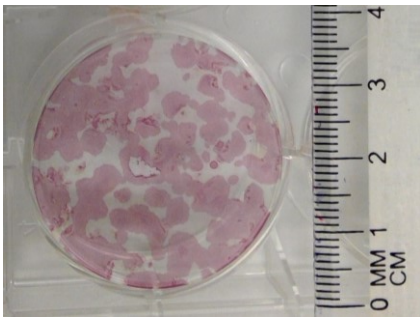

## B. Immunocytochemistry

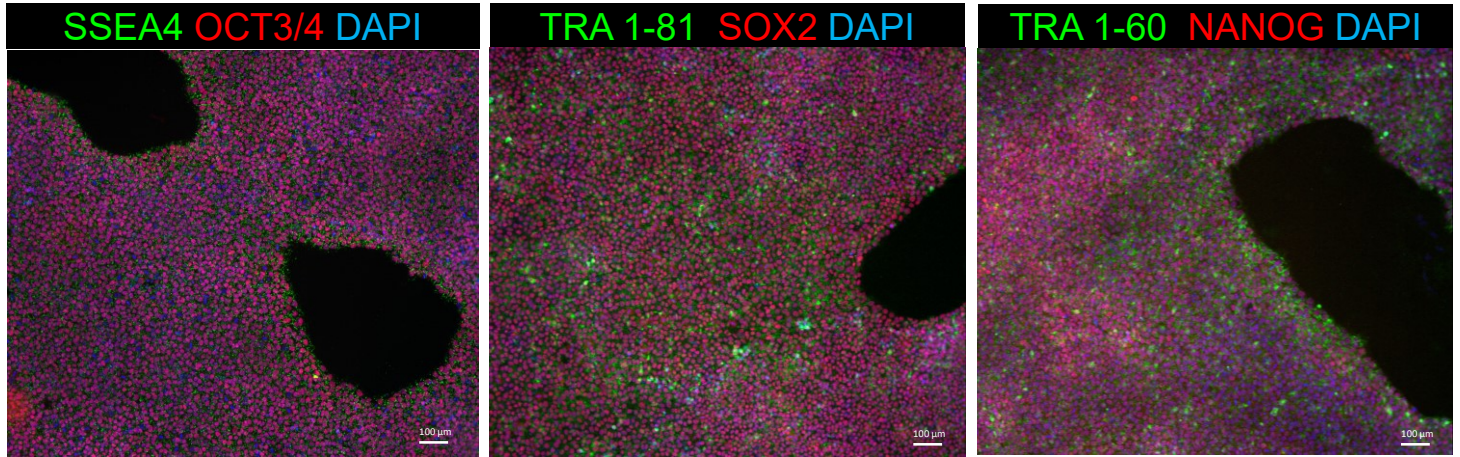

## C. Pluritest

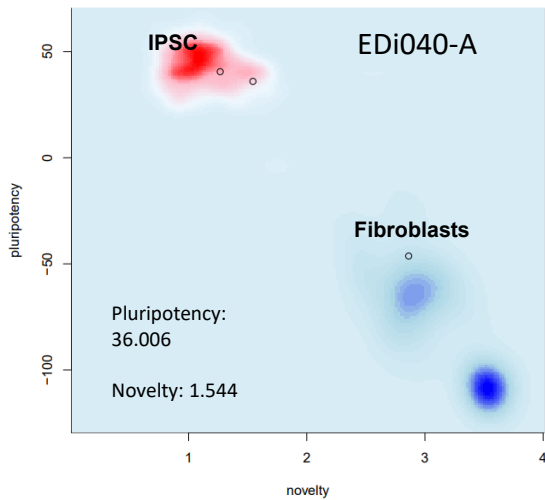

## D. G-Band karyotype

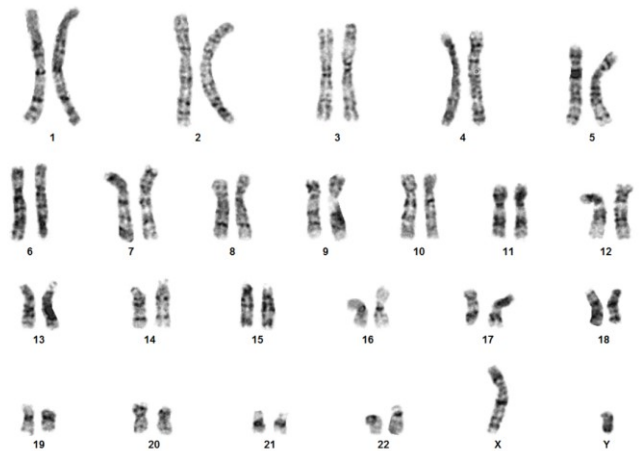

## E. hPSC Scorecard

| iPSCs      |       |      |       | Embryoid Bodies |      |      |       |
|------------|-------|------|-------|-----------------|------|------|-------|
| Self-renew | Ecto  | Meso | Endo  | Self-renew      | Ecto | Meso | Endo  |
| +          | -     | -    | -     | -               | +    | +    | +     |
| 0.01       | -0.45 | 0.24 | -0.94 | -3.18           | 1.57 | 0.98 | -0.56 |

# sFig20: Characterization for iPSC line EDi041-A

## A. AP

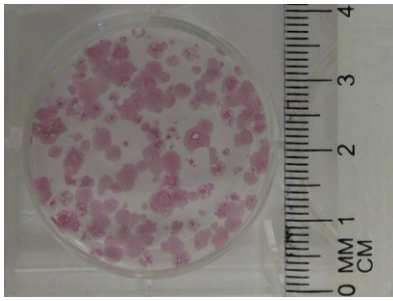

## B. Immunocytochemistry

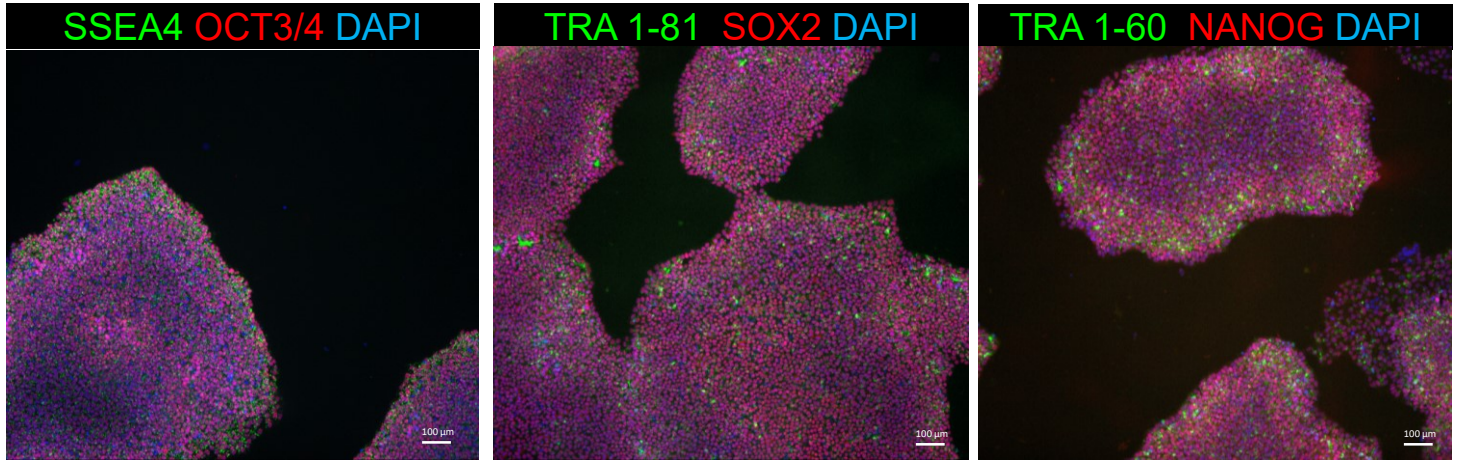

## C. Pluritest

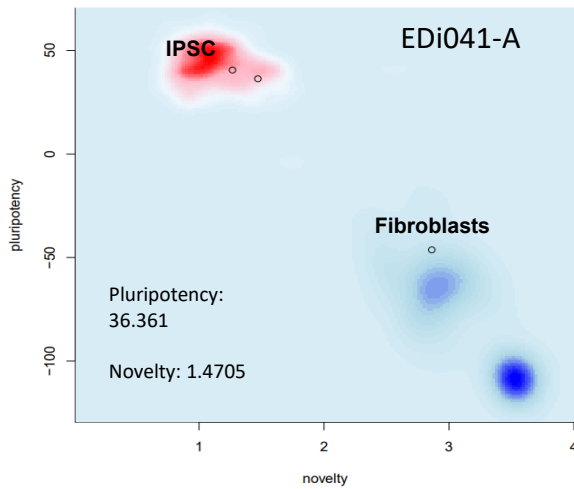

## D. G-Band karyotype

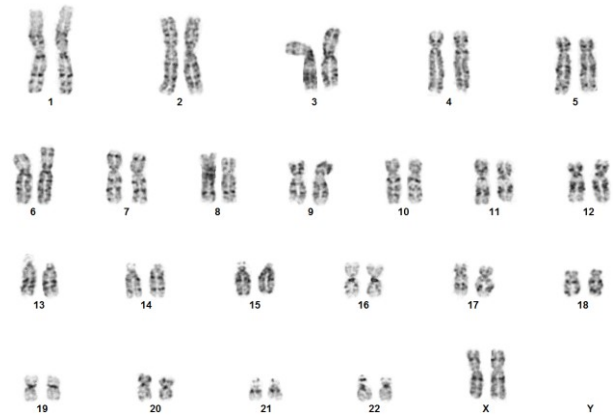

## E. hPSC Scorecard

| iPSCs      |      |       |       | Embryoid Bodies |      |      |      |
|------------|------|-------|-------|-----------------|------|------|------|
| Self-renew | Ecto | Meso  | Endo  | Self-renew      | Ecto | Meso | Endo |
| +          | -    | -     | -     | -               | +    | +    | +    |
| -0.18      | 0.05 | -0.32 | -1.24 | -7.04           | 1.61 | 1.42 | 0.67 |

# sFig21: Characterization for iPSC line EDi042-A

## A. AP

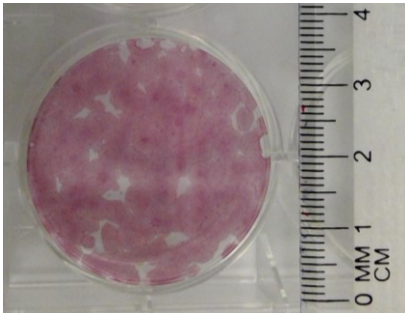

## B. Immunocytochemistry

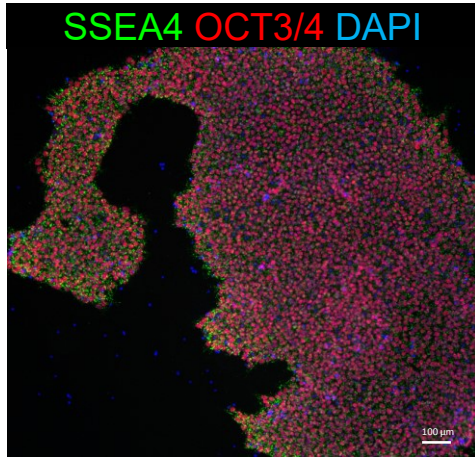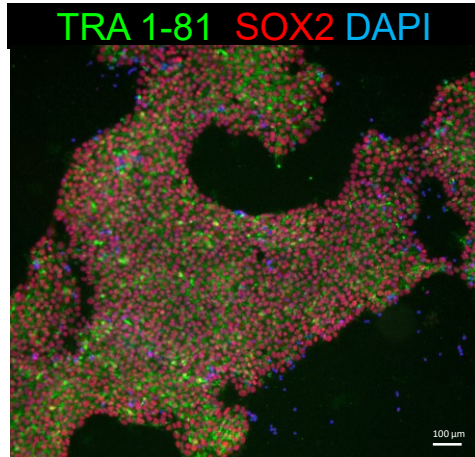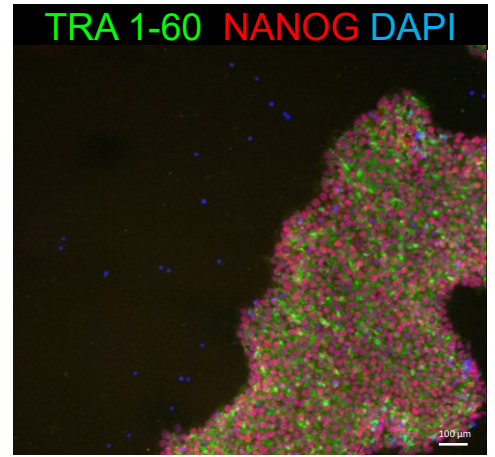

## C. Pluritest

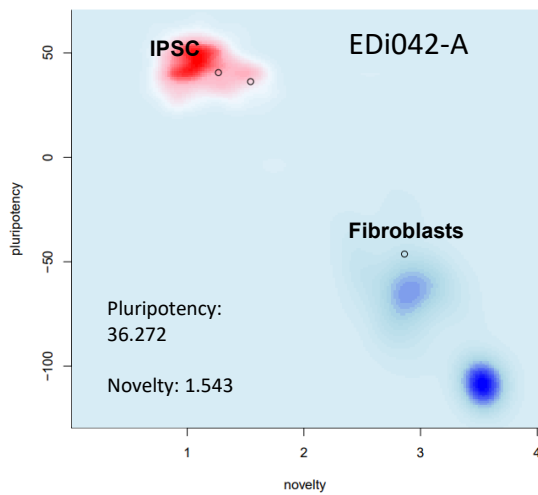

## D. G-Band karyotype

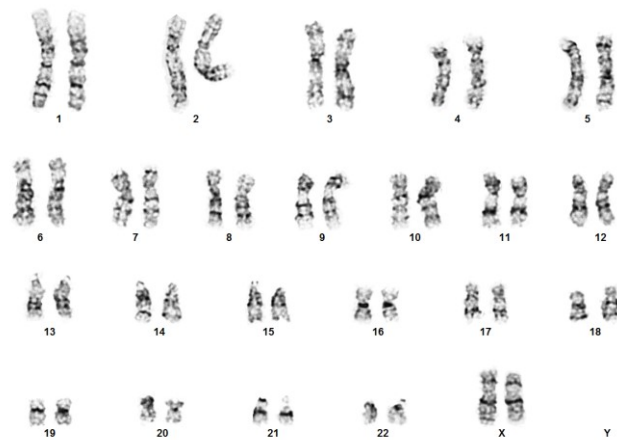

## E. hPSC Scorecard

| iPSCs      |       |      |       | Embryoid Bodies |      |      |      |
|------------|-------|------|-------|-----------------|------|------|------|
| Self-renew | Ecto  | Meso | Endo  | Self-renew      | Ecto | Meso | Endo |
| +          | -     | -    | -     | -               | +    | +    | -    |
| 0.05       | -0.13 | 0.05 | -1.04 | -5.15           | 2.62 | 1.07 | 0.22 |

# sFig22: Characterization for iPSC line EDi043-A

## A. AP

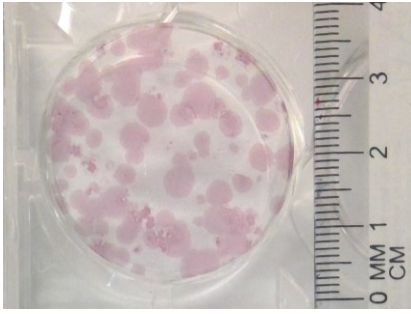

## B. Immunocytochemistry

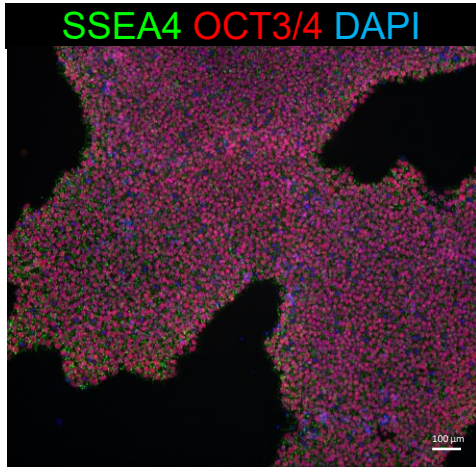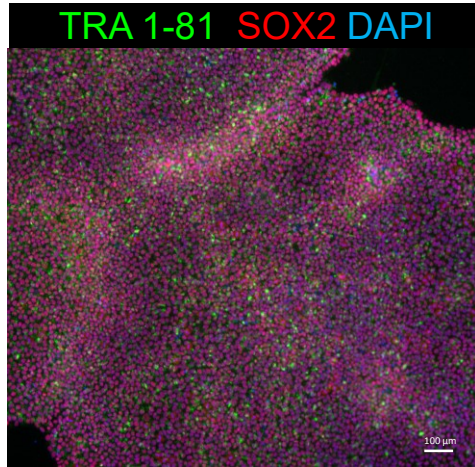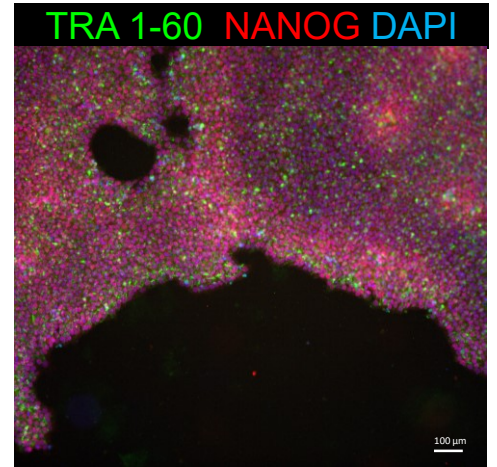

## C. Pluritest

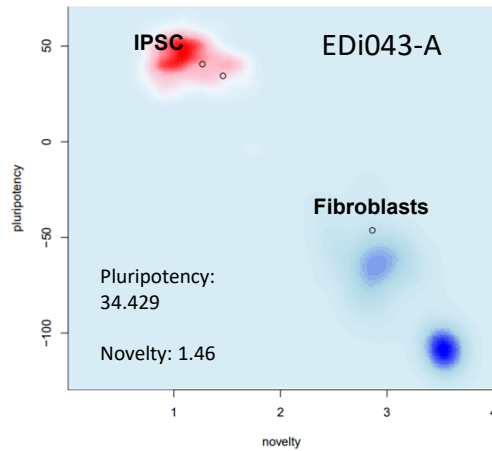

## D. G -Band karyotype

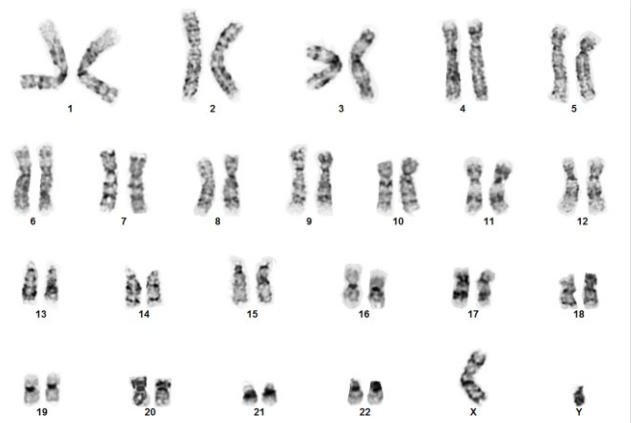

## E. hPSC Scorecard

| IPSCs      |      |      |       | Embryoid Bodies |      |      |      |
|------------|------|------|-------|-----------------|------|------|------|
| Self-renew | Ecto | Meso | Endo  | Self-renew      | Ecto | Meso | Endo |
| +          | -    | -    | -     | -               | +    | +    | +    |
| -0.03      | 0.38 | 0.07 | -1.23 | -6.46           | 1.59 | 2.57 | 1.19 |

# sFig23: Characterization for iPSC line EDi044-A

## A. AP

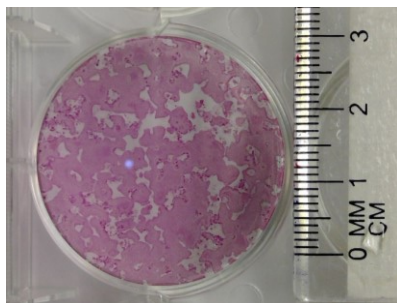

## B. Immunocytochemistry

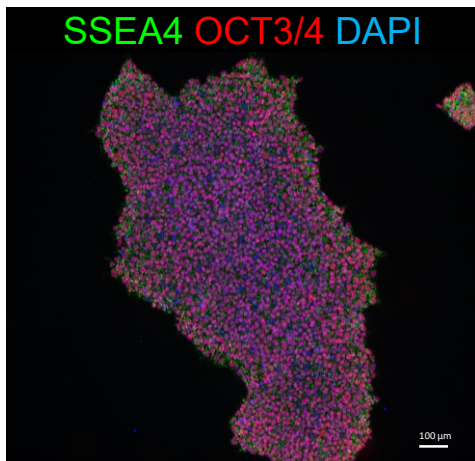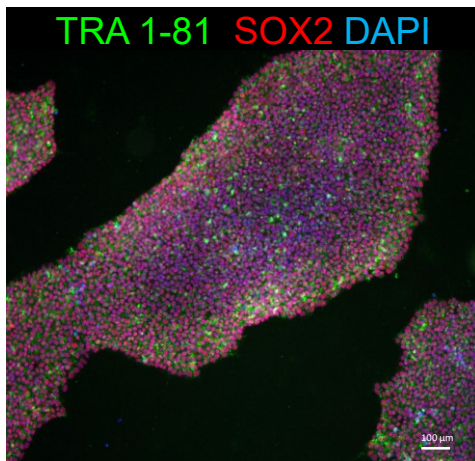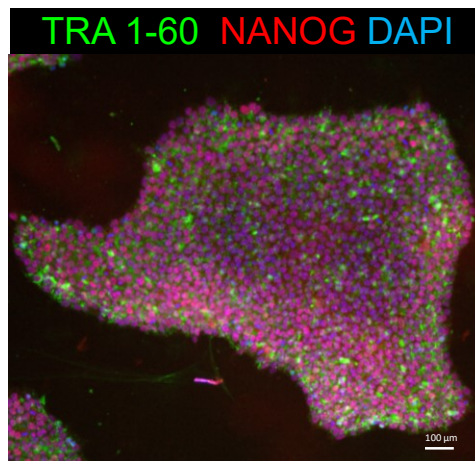

## C. Pluritest

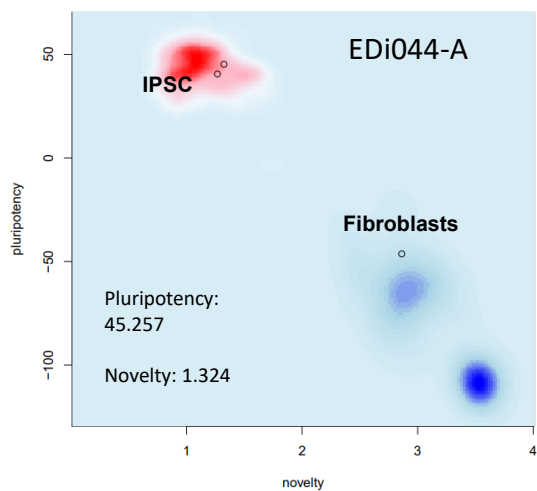

## D. G-Band karyotype

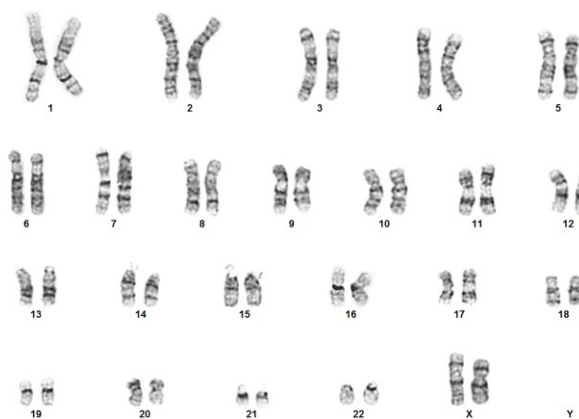

## E. hPSC Scorecard

| iPSCs      |       |      |       | Embryoid Bodies |      |      |      |
|------------|-------|------|-------|-----------------|------|------|------|
| Self-renew | Ecto  | Meso | Endo  | Self-renew      | Ecto | Meso | Endo |
| ○          | ⊖     | ⊖    | ⊖     | ⊖               | ⊕    | ⊕    | ⊕    |
| -0.75      | -0.19 | 0.58 | -0.80 | -6.29           | 1.65 | 3.42 | 0.94 |

# sFig24: Characterization for iPSC line EDi045-A

## A. AP

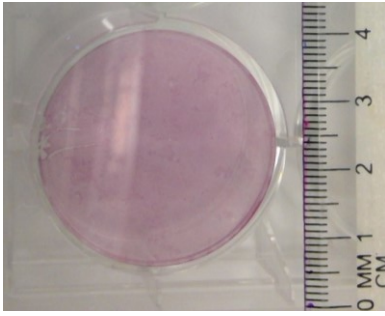

## B. Immunocytochemistry

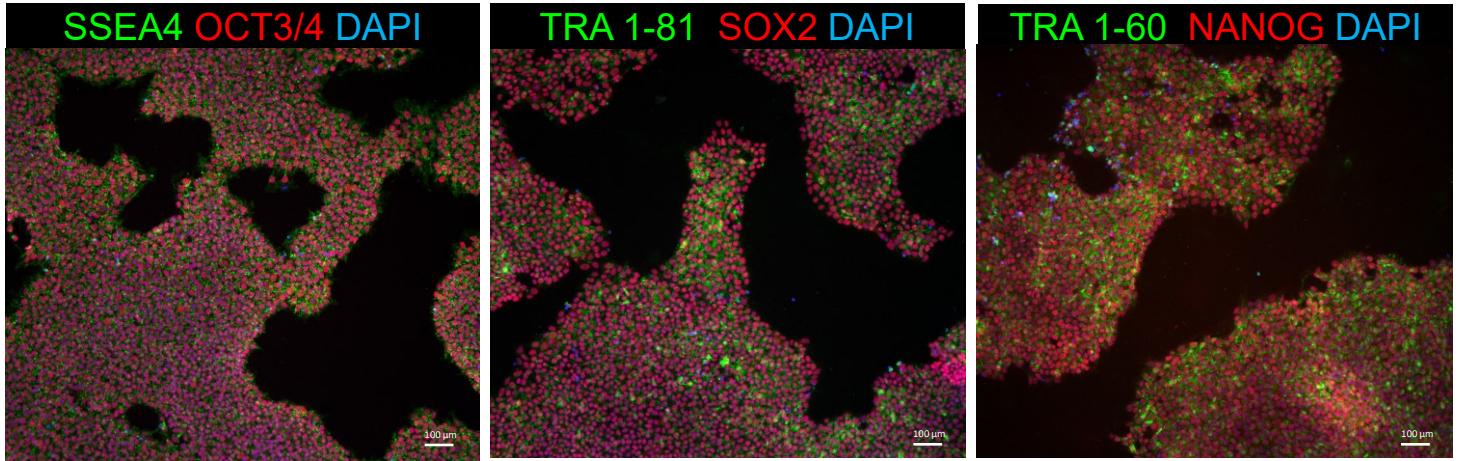

## C. Pluritest

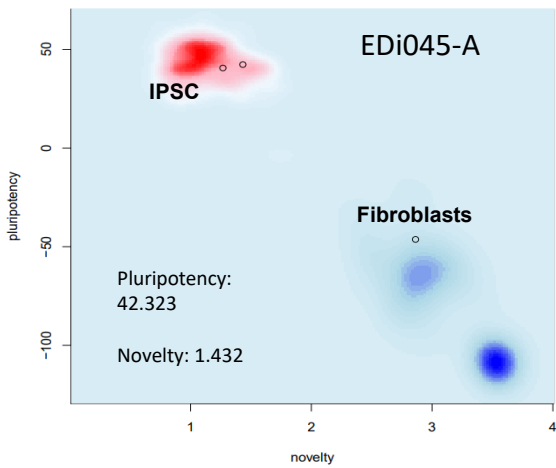

## D. G-Band karyotype

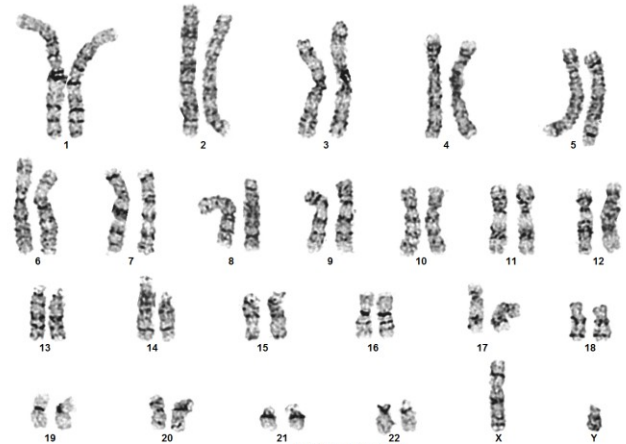

## E. hPSC Scorecard

| iPSCs      |      |      |       | Embryoid Bodies |      |      |      |
|------------|------|------|-------|-----------------|------|------|------|
| Self-renew | Ecto | Meso | Endo  | Self-renew      | Ecto | Meso | Endo |
| +          | -    | -    | -     | -               | +    | +    | +    |
| -0.11      | 0.15 | 0.22 | -0.81 | -6.43           | 2.29 | 1.53 | 0.62 |
